# Supplementary material for: A New Signal of Tropicalization in the Northeast Atlantic: The Spread of the Spotfin Burrfish Chilomycterus reticulatus in Madeira Archipelago and Its Invasion Risk
Source: MDPI journal article supplement (doi:10.3390/d13120639), 2021-12-03
Supplement: s1 [file s1]

Archive with 3 entries (3 files):
- Supplementary Material S1.pdf
- Supplementary Material S2.pdf
- Supplementary Material S3.pdf
