# Supplementary material for: A New Signal of Tropicalization in the Northeast Atlantic: The Spread of the Spotfin Burrfish Chilomycterus reticulatus in Madeira Archipelago and Its Invasion Risk
Source: MDPI journal article supplement (doi:10.3390/d13120639), 2021-12-03
Supplement: s1 [file s1]

## Supplementary Material S2

**Table S1.** Frequency of observation (%) based on the online survey for each size class of *C. reticulatus* (<30 cm; 30 to 50 cm and >50 cm).

| %          | < 30 cm | 30 cm to 50 cm | > 50 cm |
|------------|---------|----------------|---------|
| Frequently | 46.4    | 10.7           | 14.3    |
| Rarely     | 14.3    | 75             | 28.6    |
| Never      | 35.7    | 14.3           | 53.6    |
| Uncertain  | 3.6     | 0              | 3.6     |

**Table S2.** Characteristics of respondents to the online survey by conducted activity in number and percentage.

|            |                         | Diving |         | Fishing |         | Spearfishing |         | Total |         |
|------------|-------------------------|--------|---------|---------|---------|--------------|---------|-------|---------|
| #          |                         | 9      |         | 6       |         | 13           |         | 28    |         |
| Experience | 1 year                  | 1      | (11.1%) | 1       | (16.7%) | 0            | (0.0%)  | 2     | (7.1%)  |
|            | 1-5 years               | 0      | (0.0%)  | 0       | (0.0%)  | 1            | (7.7%)  | 1     | (3.6%)  |
|            | 5-10 years              | 2      | (22.2%) | 0       | (0.0%)  | 3            | (23.1%) | 5     | (17.9%) |
|            | Over 10 years           | 6      | (66.7%) | 5       | (83.3%) | 9            | (69.2%) | 20    | (71.4%) |
| Time       | 1-3hour(s) each time    | 2      | (22.2%) | 1       | (16.7%) | 3            | (23.1%) | 6     | (21.4%) |
|            | 1hour each time         | 5      | (55.6%) | 2       | (33.3%) | 0            | (0.0%)  | 7     | (25.0%) |
|            | Over 3hour(s) each time | 2      | (22.2%) | 3       | (50.0%) | 10           | (76.9%) | 15    | (53.6%) |
| Frequency  | 1 time per month        | 3      | (33.3%) | 3       | (50.0%) | 2            | (15.4%) | 8     | (28.6%) |
|            | 1 time per week         | 2      | (22.2%) | 1       | (16.7%) | 6            | (46.2%) | 9     | (32.1%) |
|            | 2-3 times per month     | 2      | (22.2%) | 2       | (33.3%) | 2            | (15.4%) | 6     | (21.4%) |
|            | 2-5 times per week      | 2      | (22.2%) | 0       | (0.0%)  | 3            | (23.1%) | 5     | (17.9%) |
| # of point | 1                       | 2      | (22.2%) | 2       | (33.3%) | 3            | (23.1%) | 7     | (25%)   |
|            | 2                       | 3      | (33.3%) | 0       | (0.0%)  | 1            | (7.7%)  | 8     | (14.3%) |
|            | 3                       | 2      | (22.2%) | 2       | (33.3%) | 2            | (15.4%) | 8     | (21.4%) |
|            | 5                       | 0      | (0.0%)  | 1       | (16.7%) | 2            | (15.4%) | 5     | (10.7%) |
|            | 6                       | 1      | (11.1%) | 0       | (0.0%)  | 2            | (15.4%) | 5     | (10.7%) |
|            | 7                       | 0      | (0.0%)  | 1       | (16.7%) | 0            | (0.0%)  | 3     | (3.6%)  |
|            | 9                       | 0      | (0.0%)  | 0       | (0.0%)  | 2            | (15.4%) | 5     | (7.1%)  |
|            | 13                      | 1      | (11.1%) | 0       | (0.0%)  | 0            | (0.0%)  | 3     | (3.6%)  |
|            | 15                      | 0      | (0.0%)  | 0       | (0.0%)  | 1            | (7.7%)  | 5     | (3.6%)  |
| Total      |                         | 33     | (100%)  | 20      | (100%)  | 66           | (100%)  | 119   | (100%)  |

**Table S3.** Dataset on additional *C. reticulatus* sightings based on scientific campaigns, museum records, scientific literature, and personal observations.

| Nr | Lat         | Long         | Year | Source                                    |
|----|-------------|--------------|------|-------------------------------------------|
| 1  | 33.0052     | -16.37033    | 2020 | MARE@PortoSanto 2020 scientific campaign  |
| 2  | 33.104194   | -16.290000   | 2016 | Emanuel Almada                            |
| 3  | 33.055667   | -16.278222   | 2017 | Emanuel Almada                            |
| 4  | 33.027389   | -16.382472   | 2020 | Emanuel Almada                            |
| 5  | 33.108972   | -16.321722   | 2020 | Emanuel Almada                            |
| 6  | 32.644485 * | -16.97613 *  | 1941 | Museu Municipal do Funchal                |
| 7  | NA          | NA           | 1941 | Museu Municipal do Funchal                |
| 8  | NA          | NA           | 1943 | Museu Municipal do Funchal                |
| 9  | NA          | NA           | 1951 | Museu Municipal do Funchal                |
| 10 | 32.641260 * | -16.895057 * | 1957 | Museu Municipal do Funchal                |
| 11 | 32.641260 * | -16.895057 * | 1960 | Museu Municipal do Funchal                |
| 12 | 32.641260 * | -16.895057 * | 1962 | Museu Municipal do Funchal                |
| 13 | NA          | NA           | 1963 | Museu Municipal do Funchal                |
| 14 | NA          | NA           | 1963 | Museu Municipal do Funchal                |
| 15 | NA          | NA           | 1963 | Museu Municipal do Funchal                |
| 16 | 32.641260 * | -16.895057 * | 1964 | Museu Municipal do Funchal                |
| 17 | NA          | NA           | 1977 | Museu Municipal do Funchal                |
| 18 | NA          | NA           | 1977 | Museu Municipal do Funchal                |
| 19 | 32.666545 * | -17.059477 * | 1990 | Museu Municipal do Funchal                |
| 20 | NA          | NA           | 1898 | Natural History Museum London             |
| 21 | NA          | NA           | 1929 | Natural History Museum London             |
| 22 | NA          | NA           | 1929 | Natural History Museum London             |
| 23 | NA          | NA           | 1933 | Natural History Museum London             |
| 24 | 30.02883333 | -16.03533333 | 2010 | M@rBis Selvagens 2010 scientific campaign |
| 25 | 30.14075    | -15.891000   | 2010 | M@rBis Selvagens 2010 scientific campaign |
| 26 | 30.14135    | -15.85346667 | 2010 | M@rBis Selvagens 2010 scientific campaign |
| 27 | 30.1428     | -15.85696667 | 2010 | M@rBis Selvagens 2010 scientific campaign |
| 28 | 30.1339     | -15.87113333 | 2010 | M@rBis Selvagens 2010 scientific campaign |
| 29 | 30.132533   | -15.87043333 | 2010 | M@rBis Selvagens 2010 scientific campaign |
| 30 | 32.84049    | -17.23706    | 2016 | Friedlander et al., 2018 <sup>1</sup>     |

\* GPS coordinates were estimated based on the description of the location in the museum's record. <sup>1</sup>Friedlander, A.M.; Ballesteros, E.; Clemente, S.; Gonçalves, E.J.; Estep, A.; Rose, P.; Sala, E. Contrasts in the marine ecosystem of two Macaronesian islands: A comparison between the remote Selvagens Reserve and Madeira Island. *PLoS One*. **2017**, *12*(11),e0187935. doi: 10.1371/journal.pone.0187935.

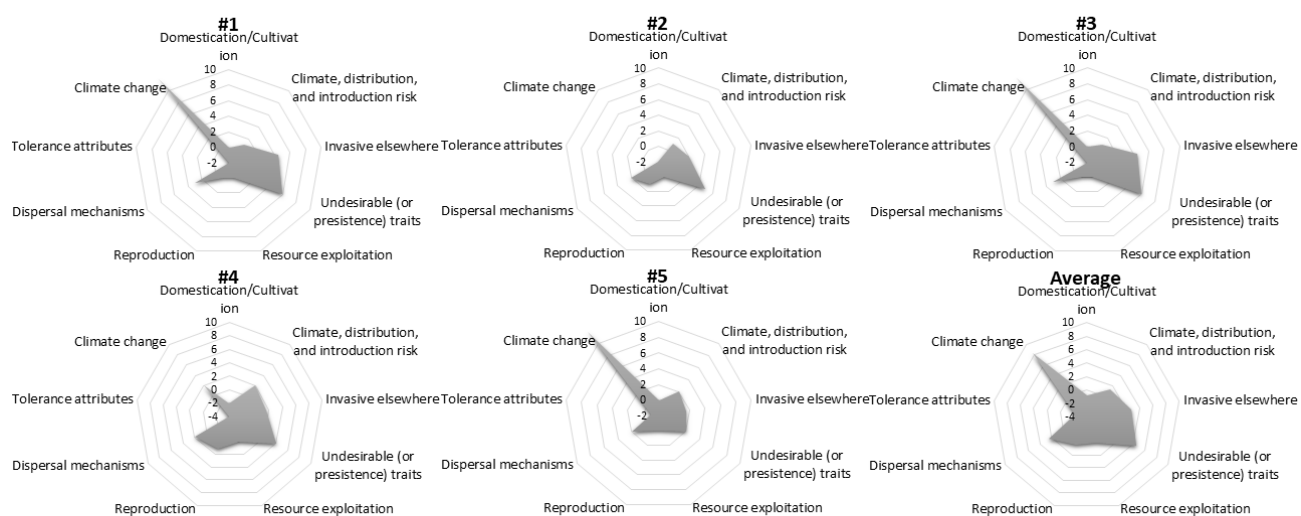

**Figure S2.** Radar plots showing the scores *C. reticulatus* achieved in the different AS-ISK categories for all five individual assessments (#1 - #5) and their average.
