# Supplementary material for: A New Signal of Tropicalization in the Northeast Atlantic: The Spread of the Spotfin Burrfish Chilomycterus reticulatus in Madeira Archipelago and Its Invasion Risk
Source: MDPI journal article supplement (doi:10.3390/d13120639), 2021-12-03
Supplement: s1 [file s1 › Supplementary Material S1.pdf]

## Supplementary Material S1

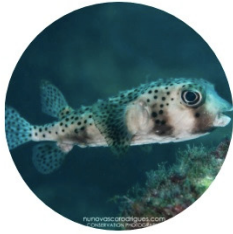
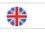

### Have you seen me lately?

Within the scope of scientific activities and research, MARE-Madeira is assessing the presence and distribution of this fish in the coastal waters of the Madeira Archipelago. We kindly ask your collaboration by filling this survey (approximately 5 minutes) to help us mapping and tracking the arrival and distribution of this fish in the region. The survey is voluntary, anonymous and collected data will be analyzed at global level.

NB: in case you have already answered, please make sure you do not repeat data entries

Are you able to identify this fish?\*

If yes, may you please write his name?

Do you remember when (month and year) you first saw this fish? \*

In the last 10 years, how do you consider sightings and/or captures of this fish? \*

Please select how frequently you have seen or captured fish(es) of the following sizes: \*

|                    | Frequently            | Rarely                | Never                 | I do not know         |
|--------------------|-----------------------|-----------------------|-----------------------|-----------------------|
| Less than 30 cm    | <input type="radio"/> | <input type="radio"/> | <input type="radio"/> | <input type="radio"/> |
| Between 30 e 50 cm | <input type="radio"/> | <input type="radio"/> | <input type="radio"/> | <input type="radio"/> |
| Over 50 cm         | <input type="radio"/> | <input type="radio"/> | <input type="radio"/> | <input type="radio"/> |

Considering the last 5 years, do you think that other fish species have appeared in the archipelagos of Madeira? \*

If yes, can you identify them and write their name(s)?

One consequence of climate change is the increase of sea water temperature. Higher water temperatures may allow the arrival and establishment of marine species from other typically warmer regions. Do you think that this can be a threat for marine biodiversity? \*

### Spot It!

Please, select an activity in which you detected this fish.  
If you practice more than one activity in which you have detected this fish, please repeat each step accordingly

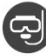  
Diving

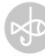  
Fishing

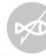  
Spearfishing

Have you practiced this activity since when? \*

How often do you do this activity? \*

On average, how much time do you spend doing this activity?\*

Please, position the pin(s) on the map (Left click). To remove a pin right click.

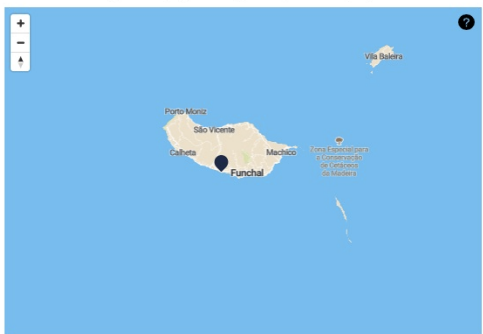

[Next](#)

[Back](#) [Submit](#)

**Figure S1.** Online custom web-based user interface used for citizen science during the study. Users complete the form (left) and proceed to pinpoint the location of spotted *C. reticulatus* during SCUBA diving, fishing, or spearfishing (right).
