# Supplementary material for: A New Signal of Tropicalization in the Northeast Atlantic: The Spread of the Spotfin Burrfish Chilomycterus reticulatus in Madeira Archipelago and Its Invasion Risk
Source: MDPI journal article supplement (doi:10.3390/d13120639), 2021-12-03
Supplement: s1 [file s1 › Supplementary Material S3.pdf]

## Supplementary Material S3

### Assessment #1

| Taxon and Assessor details         |                                                                                                                                                                                                                                            |
|------------------------------------|--------------------------------------------------------------------------------------------------------------------------------------------------------------------------------------------------------------------------------------------|
| Category                           | Fishes and Lampreys (marine)                                                                                                                                                                                                               |
| Taxon name                         | Chilomycterus reticulatus                                                                                                                                                                                                                  |
| Common name                        | Spotfin burrfish                                                                                                                                                                                                                           |
| Assessor                           | Joao Monteiro                                                                                                                                                                                                                              |
| Risk screening context             |                                                                                                                                                                                                                                            |
| Reason and socio-economic benefits | The Spotfin burrfish has a circumglobal distribution in tropical, subtropical and warm temperate areas of the Pacific, Indian and Atlantic Oceans. It has been sighted in the Mediterranean, Azores and Madeira                            |
| Risk assessment area               | Madeira                                                                                                                                                                                                                                    |
| Taxonomy                           | Animalia (Kingdom) Chordata (Phylum) Vertebrata (Subphylum) Gnathostomata (Superclass) Pisces (Superclass) Actinopterygii (Class) Tetraodontiformes (Order) Diodontidae (Family) Chilomycterus (Genus) Chilomycterus reticulatus (Species) |
| Native range                       | Gulf of Mexico, Atlantic, Indian and Pacific Oceans                                                                                                                                                                                        |
| Introduced range                   | Mediterranean Sea and maybe Azores and Madeira                                                                                                                                                                                             |
| URL                                |                                                                                                                                                                                                                                            |

|                                                |      |                                                                                               | Response | Justification (references and/or other information)                                      | Confidence |
|------------------------------------------------|------|-----------------------------------------------------------------------------------------------|----------|------------------------------------------------------------------------------------------|------------|
| A. Biogeography/Historical                     |      |                                                                                               |          |                                                                                          |            |
| 1. Domestication/Cultivation                   |      |                                                                                               |          |                                                                                          |            |
| 1                                              | 1.01 | Has the taxon been the subject of domestication (or cultivation) for at least 20 generations? | No       | No information is available on C. reticulatus domestication.                             | High       |
| 2                                              | 1.02 | Is the taxon harvested in the wild and likely to be sold or used in its live form?            | Yes      | In African countries it is often captured, dried and sold as ornaments                   | Medium     |
| 3                                              | 1.03 | Does the taxon have invasive races, varieties, sub-taxa or congeners?                         | No       | There are no records or evidence of invasive traits in the taxon or closely related taxa | Medium     |
| 2. Climate, distribution and introduction risk |      |                                                                                               |          |                                                                                          |            |
| 4                                              | 2.01 | How similar are the climatic conditions of the RA area and the taxon's native range?          | Medium   | Climatch score ranges between 3 and 8 when compared to the canary islands.               | High       |

|                                               |      |                                                                                                                                                                         |        |                                                                                                                                                                                                                                                                                                                         |           |
|-----------------------------------------------|------|-------------------------------------------------------------------------------------------------------------------------------------------------------------------------|--------|-------------------------------------------------------------------------------------------------------------------------------------------------------------------------------------------------------------------------------------------------------------------------------------------------------------------------|-----------|
| 5                                             | 2.02 | What is the quality of the climate matching data?                                                                                                                       | Medium | There are not a lot of stations in climatch are limited and with wide range of scores                                                                                                                                                                                                                                   | Medium    |
| 6                                             | 2.03 | Is the taxon already present outside of captivity in the RA area?                                                                                                       | Yes    | There are multiple records of <i>Chilomycterus reticulatus</i> in Madeira.                                                                                                                                                                                                                                              | Very high |
| 7                                             | 2.04 | How many potential pathways could the taxon use to enter in the RA area?                                                                                                | >1     | <i>C. reticulatus</i> may enter in Madeira rafting under surface debris or sargassum, and in larval or post-larval phase transported by ballast water (Afonso et al. 2013)                                                                                                                                              | Medium    |
| 8                                             | 2.05 | Is the taxon currently found in close proximity to, and likely to enter into, the RA area in the near future (e.g. unintentional and intentional introductions)?        | Yes    | <i>Chilomycterus reticulatus</i> is present in the Canary islands and there are multiple records deposited in the Museu Municipal do Funchal and in the Natural History Museum of London (Wirtz et al. 2008)                                                                                                            | High      |
| <b>3. Invasive elsewhere</b>                  |      |                                                                                                                                                                         |        |                                                                                                                                                                                                                                                                                                                         |           |
| 9                                             | 3.01 | Has the taxon become naturalised (established viable populations) outside its native range?                                                                             | Yes    | <i>Chilomycterus reticulatus</i> became naturalised outside its native range, e.g. in the Island of el Hierro (Canary Islands) the species established viable populations and it is really common since at least the late 1980s (Brito and Falcón 1990).                                                                | Medium    |
| 10                                            | 3.02 | In the taxon's introduced range, are there known adverse impacts to wild stocks or commercial taxa?                                                                     | No     | No information is available on the impact of this species on wild stock or commercial taxa in its introduced range.                                                                                                                                                                                                     | Medium    |
| 11                                            | 3.03 | In the taxon's introduced range, are there known adverse impacts to aquaculture?                                                                                        | Yes    | The taxon hosts a parasite that is known to have had adverse impacts on aquaculture stocks                                                                                                                                                                                                                              | Low       |
| 12                                            | 3.04 | In the taxon's introduced range, are there known adverse impacts to ecosystem services?                                                                                 | No     | No information is available on the adverse impact of <i>C. reticulatus</i> to ecosystem services in its introduced range.                                                                                                                                                                                               | Medium    |
| 13                                            | 3.05 | In the taxon's introduced range, are there known adverse socio-economic impacts?                                                                                        | No     | No information is available on adverse socio-economic impacts by <i>C. reticulatus</i> in its introduced range.                                                                                                                                                                                                         | Medium    |
| <b>B. Biology/Ecology</b>                     |      |                                                                                                                                                                         |        |                                                                                                                                                                                                                                                                                                                         |           |
| <b>4. Undesirable (or persistence) traits</b> |      |                                                                                                                                                                         |        |                                                                                                                                                                                                                                                                                                                         |           |
| 14                                            | 4.01 | Is it likely that the taxon will be poisonous, or pose other risks to human health?                                                                                     | Yes    | <i>Chilomycterus reticulatus</i> has an inflatable body covered by numerous spines that may, theoretically, cause injury to humans.                                                                                                                                                                                     | Low       |
| 15                                            | 4.02 | Is it likely that the taxon will smother one or more native taxa (that are not threatened or protected)?                                                                | n.a.   | Taxa is not a plat, algae or other sessile organism that can overgrow and smother native taxa                                                                                                                                                                                                                           | Very high |
| 16                                            | 4.03 | Are there threatened or protected taxa that the non-native taxon would parasitise in the RA area?                                                                       | No     | There are no known threatened or protected taxa that could be affected                                                                                                                                                                                                                                                  | High      |
| 17                                            | 4.04 | Is the taxon adaptable in terms of climatic and other environmental conditions, thus enhancing its potential persistence if it has invaded or could invade the RA area? | No     | <i>Chilomycterus reticulatus</i> has a circumglobal distribution in tropical, subtropical and warm temperate areas of the Pacific, Indian and Atlantic oceans (Leis et al. 2015), which suggests that it is constrained to reasonably warm waters. There is no other evidence that the taxa can adapt to new conditions | Medium    |
| 18                                            | 4.05 | Is the taxon likely to disrupt food-web structure/function in aquatic ecosystems it has or is likely to invade in the RA area?                                          | No     | No information is available on the negative impact of <i>C. reticulatus</i> on food-web structure and/or function.                                                                                                                                                                                                      | Medium    |
| 19                                            | 4.06 | Is the taxon likely to exert adverse impacts on ecosystem services in the RA area?                                                                                      | No     | There is no evidence to support that <i>C. reticulatus</i> could promote adverse impacts on ecosystem services in Madeira.                                                                                                                                                                                              | Medium    |

|                          |      |                                                                                                                                                           |     |                                                                                                                                                                                                                                                                                                                           |        |
|--------------------------|------|-----------------------------------------------------------------------------------------------------------------------------------------------------------|-----|---------------------------------------------------------------------------------------------------------------------------------------------------------------------------------------------------------------------------------------------------------------------------------------------------------------------------|--------|
| 20                       | 4.07 | Is it likely that the taxon will host, and/or act as a vector for, recognised pests and infectious agents that are endemic in the RA area?                | Yes | There are records of ciguatera being present in the RA. <i>Chilomycterus</i> spp. have been implicated in ciguatera poisoning and, as such, the taxa could serve as vector to ciguatera                                                                                                                                   | Medium |
| 21                       | 4.08 | Is it likely that the taxon will host, and/or act as a vector for, recognised pests and infectious agents that are absent from (novel to) the RA area?    | Yes | <i>Chilomycterus reticulatus</i> is known to host several parasites, including four opisthobolines (Martin et al. 2018), a cymothoid isopod (Nagasawa and Doi 2012; Nagasawa and Uyeno, 2012) and a copepod (Uyeno and Nagasawa 2009) from Japan (all) and Senegal (the copepod <i>Hatschekia legouli</i> ; Jones, 1985). | Medium |
| 22                       | 4.09 | Is it likely that the taxon will achieve a body size that will make it more likely to be released from captivity?                                         | No  | <i>Chilomycterus reticulatus</i> is not generally subject to home aquarium captivity. Local public aquaria, sometimes host the taxa, however these do not grow to sizes that would warrant their release.                                                                                                                 | Medium |
| 23                       | 4.10 | Is the taxon capable of sustaining itself in a range of water velocity conditions (e.g. versatile in habitat use)?                                        | No  | The taxa has limited motility and typically dwell in sheltered areas and close to the bottom. There is no evidence that they can persist in flowing waters with 0.7 m per second velocities.                                                                                                                              | Low    |
| 24                       | 4.11 | Is it likely that the taxon's mode of existence (e.g. excretion of by-products) or behaviours (e.g. feeding) will reduce habitat quality for native taxa? | No  | No information is available on habitat quality reduction by <i>C. reticulatus</i> for native taxa.                                                                                                                                                                                                                        | Medium |
| 25                       | 4.12 | Is the taxon likely to maintain a viable population even when present in low densities (or persisting in adverse conditions by way of a dormant form)?    | Yes | In Canary Islands, such as other localities where <i>C. reticulatus</i> is native, the species is likely to maintain viable population even if present in low densities (e.g. Brito and Falcón 1990; Espino et al. 2019)                                                                                                  | High   |
| 5. Resource exploitation |      |                                                                                                                                                           |     |                                                                                                                                                                                                                                                                                                                           |        |
| 26                       | 5.01 | Is the taxon likely to consume threatened or protected native taxa in RA area?                                                                            | No  | <i>Chilomycterus reticulatus</i> feeds on hard-shelled invertebrates, but none of the stomach contents analysed by Brito and Falcón (1990) belong to threatened or protected native taxa of Madeira. Also,                                                                                                                | Medium |
| 27                       | 5.02 | Is the taxon likely to sequester food resources (including nutrients) to the detriment of native taxa in the RA area?                                     | No  | There is no evidence that the taxa can consume prey at the expense of native species                                                                                                                                                                                                                                      | Medium |
| 6. Reproduction          |      |                                                                                                                                                           |     |                                                                                                                                                                                                                                                                                                                           |        |
| 28                       | 6.01 | Is the taxon likely to exhibit parental care and/or to reduce age-at-maturity in response to environmental conditions?                                    | No  | <i>Chilomycterus reticulatus</i> doesn't exhibit parental care (Almada et al. 1999), while no information is available on age at maturity reduction in response to environmental conditions.                                                                                                                              | High   |
| 29                       | 6.02 | Is the taxon likely to produce viable gametes or propagules (in the RA area)?                                                                             | Yes | Madeira has a subtropical climate that matches conditions within the range in which the taxa is established (e.g. canary islands)                                                                                                                                                                                         | Medium |
| 30                       | 6.03 | Is the taxon likely to hybridize naturally with native taxa?                                                                                              | No  | No information is available on <i>C. reticularis</i> , however there are no other close taxa in RA, with which it could hybridise                                                                                                                                                                                         | High   |
| 31                       | 6.04 | Is the taxon likely to be hermaphroditic or to display asexual reproduction?                                                                              | No  | No information is available on asexual reproduction or hermaphroditism of <i>C. reticulatus</i> .                                                                                                                                                                                                                         | Medium |
| 32                       | 6.05 | Is the taxon dependent on the presence of another taxon (or specific habitat features) to complete its life cycle?                                        | No  | No information is available on the need of other taxon to complete the life cycle of <i>C. reticulatus</i> , and the preferential spawning ground is unknown (De Andrade et al. 2016),                                                                                                                                    | Medium |

|                         |      |                                                                                                                                                                                           |      |                                                                                                                                                                                                                                                                                                               |           |
|-------------------------|------|-------------------------------------------------------------------------------------------------------------------------------------------------------------------------------------------|------|---------------------------------------------------------------------------------------------------------------------------------------------------------------------------------------------------------------------------------------------------------------------------------------------------------------|-----------|
|                         |      |                                                                                                                                                                                           |      | however there are no evidence that would suggest it would require other taxa to complete its life cycle                                                                                                                                                                                                       |           |
| 33                      | 6.06 | Is the taxon known (or likely) to produce a large number of propagules or offspring within a short time span (e.g. <1 year)?                                                              | No   | No information is available on the reproduction of <i>C. reticulatus</i> .                                                                                                                                                                                                                                    | Low       |
| 34                      | 6.07 | How many time units (days, months, years) does the taxon require to reach the age-at-first-reproduction? [In the Justification field, indicate the relevant time unit being used.]        | n.a. | There is no information on the age at first reproduction of <i>C. reticulatus</i> .                                                                                                                                                                                                                           | High      |
| 7. Dispersal mechanisms |      |                                                                                                                                                                                           |      |                                                                                                                                                                                                                                                                                                               |           |
| 35                      | 7.01 | How many potential internal pathways could the taxon use to disperse within the RA area (with suitable habitats nearby)?                                                                  | >1   | <i>Chilomycterus reticulatus</i> could disperse within of Madeira area through ballast water (larvae or post-larvae) and rafting on floating objects or <i>Sargassum</i> sp. (juvenile/adult) (Afonso et al. 2013).                                                                                           | High      |
| 36                      | 7.02 | Will any of these pathways bring the taxon in close proximity to one or more protected areas (e.g. MCZ, MPA, SSSI)?                                                                       | Yes  | In Madeira there are some MPAs, and a couple of them (Cabo Girão and Garajau) are close to Funchal, the capital of the Island, characterized by the highest shipping traffic.                                                                                                                                 | High      |
| 37                      | 7.03 | Does the taxon have a means of actively attaching itself to hard substrata (e.g. ship hulls, pilings, buoys) such that it enhances the likelihood of dispersal?                           | No   | No information is available on it.                                                                                                                                                                                                                                                                            | High      |
| 38                      | 7.04 | Is natural dispersal of the taxon likely to occur as eggs (for animals) or as propagules (for plants: seeds, spores) in the RA area?                                                      | Yes  | Eggs of <i>C. reticulatus</i> are pelagic and drift in surface oceanic water (Luiz et al. 2012).                                                                                                                                                                                                              | High      |
| 39                      | 7.05 | Is natural dispersal of the taxon likely to occur as larvae/juveniles (for animals) or as fragments/seedlings (for plants) in the RA area?                                                | Yes  | Larvae of <i>C. reticularis</i> are pelagic and mostly disperse through rafting (Afonso et al. 2013) and commonly juveniles are associated with floating weeds (Kuitert and Tonozuka 2001). Additionally, records in Madeira suggests that it often manages to cross open ocean environment and reach Madeira | Very high |
| 40                      | 7.06 | Are older life stages of the taxon likely to migrate in the RA area for reproduction?                                                                                                     | No   | No evidence is available on that.                                                                                                                                                                                                                                                                             | Low       |
| 41                      | 7.07 | Are propagules or eggs of the taxon likely to be dispersed in the RA area by other animals?                                                                                               | No   | No information is available, but the larvae of <i>C. reticulatus</i> are pelagic, so probably the dispersal does not involve other animals.                                                                                                                                                                   | Medium    |
| 42                      | 7.08 | Is dispersal of the taxon along any of the pathways mentioned in the previous seven questions (7.01–7.07; i.e. both unintentional or intentional) likely to be rapid?                     | Yes  | Since eggs or larvae of <i>C. reticulatus</i> can arrive in Madeira through ballast water, this vector can be considered rapid (< 1 year).                                                                                                                                                                    | Low       |
| 43                      | 7.09 | Is dispersal of the taxon density dependent?                                                                                                                                              | No   | No information is available on that.                                                                                                                                                                                                                                                                          | Low       |
| 8. Tolerance attributes |      |                                                                                                                                                                                           |      |                                                                                                                                                                                                                                                                                                               |           |
| 44                      | 8.01 | Is the taxon able to withstand being out of water for extended periods (e.g. minimum of one or more hours) at some stage of its life cycle?                                               | No   | No information is available on that.                                                                                                                                                                                                                                                                          | Low       |
| 45                      | 8.02 | Is the taxon tolerant of a wide range of water quality conditions relevant to that taxon? [In the Justification field, indicate the relevant water quality variable(s) being considered.] | No   | Occurrences and distribution do not provide evidence to support or suggest that taxon to be particularly tolerant                                                                                                                                                                                             | Low       |

|                          |      |                                                                                                                                                              |          |                                                                                                                                                                                                                                                                                                                                                                                                                                                                                            |        |
|--------------------------|------|--------------------------------------------------------------------------------------------------------------------------------------------------------------|----------|--------------------------------------------------------------------------------------------------------------------------------------------------------------------------------------------------------------------------------------------------------------------------------------------------------------------------------------------------------------------------------------------------------------------------------------------------------------------------------------------|--------|
| 46                       | 8.03 | Can the taxon be controlled or eradicated in the wild with chemical, biological, or other agents/means?                                                      | No       | There is no evidence of successful control or eradication                                                                                                                                                                                                                                                                                                                                                                                                                                  | Low    |
| 47                       | 8.04 | Is the taxon likely to tolerate or benefit from environmental/human disturbance?                                                                             | No       | There is no evidence to suggest it                                                                                                                                                                                                                                                                                                                                                                                                                                                         | Low    |
| 48                       | 8.05 | Is the taxon able to tolerate salinity levels that are higher or lower than those found in its usual environment?                                            | No       | Chilomycterus reticulatus is classified as marine stenohaline in González-Acosta et al. (2018). In De Andrade et al. (2016) is classified as Euryhaline Marine, but the reference (Vilar et al. 2011) is about another species of the same genus, C. spinosus spinosus, that rarely was found in the estuary of Baía da Babitonga.                                                                                                                                                         | Medium |
| 49                       | 8.06 | Are there effective natural enemies (predators) of the taxon present in the RA area?                                                                         | No       | No predators or natural enemies of C. reticulatus seem to be present in Madeira.                                                                                                                                                                                                                                                                                                                                                                                                           | Medium |
| <b>C. Climate change</b> |      |                                                                                                                                                              |          |                                                                                                                                                                                                                                                                                                                                                                                                                                                                                            |        |
| 9. Climate change        |      |                                                                                                                                                              |          |                                                                                                                                                                                                                                                                                                                                                                                                                                                                                            |        |
| 50                       | 9.01 | Under the predicted future climatic conditions, are the risks of entry into the RA area posed by the taxon likely to increase, decrease or not change?       | Increase | In recent decades, several marine organisms expanded their distribution ranges due to ocean warming, as happened for C. reticulatus in Canary Islands (Espino et al. 2019). Range expansion facilitated by climate change and warming conditions is likely to increase risks for the RA                                                                                                                                                                                                    | High   |
| 51                       | 9.02 | Under the predicted future climatic conditions, are the risks of establishment posed by the taxon likely to increase, decrease or not change?                | Increase | In Gran Canaria (Canary Islands) the increase in the presence of C. reticulatus in recent decades, seem to be related to the increase of SST registered in the area, facilitating the range expansion and the establishment of the species (Espino et al. 2019).                                                                                                                                                                                                                           | High   |
| 52                       | 9.03 | Under the predicted future climatic conditions, are the risks of dispersal within the RA area posed by the taxon likely to increase, decrease or not change? | Increase | In Gran Canaria (Canary Islands) the increase in the presence of C. reticulatus in recent decades, seem to be related to the increase of SST registered in the area, facilitating the dispersal of the species within the Island of Gran Canaria (Espino et al. 2019). Additionally, increasing frequency and severity of storms is likely to facilitate larval and individuals dispersal                                                                                                  | High   |
| 53                       | 9.04 | Under the predicted future climatic conditions, what is the likely magnitude of future potential impacts on biodiversity and/or ecological integrity/status? | Higher   | Chilomycterus reticulatus could impact the biodiversity and ecological status of the coast, eating the key herbivore species of sea urchin of Madeira (Diadema africanum) and thus reducing the urchin barren favoring the recover of macroalgae. Urchin's disease outbreaks also seem to be linked with warm conditions. The compounding effect of both, enhanced by higher SSTs can promote phase shifts from urchin barrens to algae biotopes, which is likely to increase biodiversity | Medium |
| 54                       | 9.05 | Under the predicted future climatic conditions, what is the likely magnitude of future potential impacts on ecosystem structure and/or function?             | Higher   | Chilomycterus reticulatus could impact the biodiversity and ecological status of the coast, eating the key herbivore species of sea urchin of Madeira (Diadema africanum) and thus reducing the urchin barren favoring the recover of macroalgae. Urchin's disease outbreaks also seem to be linked with warm conditions. The compounding effect of both, enhanced by higher SSTs can promote phase shifts from urchin barrens to algae biotopes - changing local benthic communities      | Medium |

|    |      |                                                                                                                                                        |        |                                                                                                                                                                                                                                                                                                                                                                                                                                                                                                                                                        |     |
|----|------|--------------------------------------------------------------------------------------------------------------------------------------------------------|--------|--------------------------------------------------------------------------------------------------------------------------------------------------------------------------------------------------------------------------------------------------------------------------------------------------------------------------------------------------------------------------------------------------------------------------------------------------------------------------------------------------------------------------------------------------------|-----|
| 55 | 9.06 | Under the predicted future climatic conditions, what is the likely magnitude of future potential impacts on ecosystem services/socio-economic factors? | Higher | Climate change could cause an increase of abundance of <i>C. reticulatus</i> , thus consequently it should impact the population of the key herbivore species of sea urchin <i>Diadema africanum</i> , reducing it. A reduction of <i>D. africanum</i> , would permit to reduce the barren state highly present in Madeira, favoring the repopulation of macro algae and consequently of the associated biodiversity, promoting new and enhanced ecosystem services. As such, it is likely to positively impact ecosystem services in coastal habitats | Low |
|----|------|--------------------------------------------------------------------------------------------------------------------------------------------------------|--------|--------------------------------------------------------------------------------------------------------------------------------------------------------------------------------------------------------------------------------------------------------------------------------------------------------------------------------------------------------------------------------------------------------------------------------------------------------------------------------------------------------------------------------------------------------|-----|

| Statistics                                     |        |
|------------------------------------------------|--------|
| Scores                                         |        |
| BRA Score                                      | 9,5    |
| BRA Outcome                                    | Medium |
| BRA+CCA Score                                  | 21,5   |
| BRA+CCA Outcome                                | Medium |
| Score partition                                |        |
| A. Biogeography/Historical                     | 6,5    |
| 1. Domestication/Cultivation                   | 0      |
| 2. Climate, distribution and introduction risk | 2      |
| 3. Invasive elsewhere                          | 4,5    |
| B. Biology/Ecology                             | 3      |
| 4. Undesirable (or persistence) traits         | 3      |
| 5. Resource exploitation                       | 0      |
| 6. Reproduction                                | 0      |
| 7. Dispersal mechanisms                        | 2      |
| 8. Tolerance attributes                        | -2     |
| C. Climate change                              | 12     |
| 9. Climate change                              | 12     |
| Answered Questions                             |        |
| Total                                          | 55     |

| Thresholds |      |
|------------|------|
| BRA        | 12,5 |
| BRA+CCA    | 23.4 |
| Confidence |      |
| BRA+CCA    | 0.54 |
| BRA        | 0.54 |
| CCA        | 0.58 |

| Date and Time       |
|---------------------|
| 02.08.2021 10:31:33 |

|                                                |             |
|------------------------------------------------|-------------|
| <b>A. Biogeography/Historical</b>              | <b>13</b>   |
| 1. Domestication/Cultivation                   | 3           |
| 2. Climate, distribution and introduction risk | 5           |
| 3. Invasive elsewhere                          | 5           |
| <b>B. Biology/Ecology</b>                      | <b>36</b>   |
| 4. Undesirable (or persistence) traits         | 12          |
| 5. Resource exploitation                       | 2           |
| 6. Reproduction                                | 7           |
| 7. Dispersal mechanisms                        | 9           |
| 8. Tolerance attributes                        | 6           |
| <b>C. Climate change</b>                       | <b>6</b>    |
| 9. Climate change                              | 6           |
| <b>Sectors affected</b>                        |             |
| <b>Commercial</b>                              | <b>10</b>   |
| <b>Environmental</b>                           | <b>5</b>    |
| <b>Species or population nuisance traits</b>   | <b>11,5</b> |

## Assessment #2

| Taxon and Assessor details         |                                                                                                                                                                                                                                                                                                                                                                                                            |
|------------------------------------|------------------------------------------------------------------------------------------------------------------------------------------------------------------------------------------------------------------------------------------------------------------------------------------------------------------------------------------------------------------------------------------------------------|
| Category                           | Fishes and Lampreys (marine)                                                                                                                                                                                                                                                                                                                                                                               |
| Taxon name                         | Chilomycterus reticulatus                                                                                                                                                                                                                                                                                                                                                                                  |
| Common name                        | Spotfin burrfish                                                                                                                                                                                                                                                                                                                                                                                           |
| Assessor                           | Francesca Gizzi                                                                                                                                                                                                                                                                                                                                                                                            |
| Risk screening context             |                                                                                                                                                                                                                                                                                                                                                                                                            |
| Reason and socio-economic benefits | The Spotfin burrfish has a circumglobal distribution in tropical, subtropical and warm temperate areas of the Pacific, Indian and Atlantic Oceans. It reached the neighbouring Canary Island and with really low frequency also the Azores. Despite the species being widely distributed, it is not common. It arrived in Madeira in 1941, but few information is available on the status of this species. |
| Risk assessment area               | Madeira                                                                                                                                                                                                                                                                                                                                                                                                    |
| Taxonomy                           | Animalia (Kingdom) Chordata (Phylum) Vertebrata (Subphylum) Gnathostomata (Superclass) Pisces (Superclass) Actinopterygii (Class) Tetraodontiformes (Order) Diodontidae (Family) Chilomycterus (Genus) Chilomycterus reticulatus (Species)                                                                                                                                                                 |
| Native range                       | Gulf of Mexico, Atlantic, Indian and Pacific Oceans                                                                                                                                                                                                                                                                                                                                                        |
| Introduced range                   | Mediterranean Sea, Canary Islands, Azores, (maybe) Madeira                                                                                                                                                                                                                                                                                                                                                 |
| URL                                |                                                                                                                                                                                                                                                                                                                                                                                                            |

|                                                |      |                                                                                               | Response | Justification (references and/or other information)                                                                                                                                                                                                                                                                                                                                          | Confidence |
|------------------------------------------------|------|-----------------------------------------------------------------------------------------------|----------|----------------------------------------------------------------------------------------------------------------------------------------------------------------------------------------------------------------------------------------------------------------------------------------------------------------------------------------------------------------------------------------------|------------|
| A. Biogeography/Historical                     |      |                                                                                               |          |                                                                                                                                                                                                                                                                                                                                                                                              |            |
| 1. Domestication/Cultivation                   |      |                                                                                               |          |                                                                                                                                                                                                                                                                                                                                                                                              |            |
| 1                                              | 1.01 | Has the taxon been the subject of domestication (or cultivation) for at least 20 generations? | No       | No information is available on C. reticulatus domestication.                                                                                                                                                                                                                                                                                                                                 | High       |
| 2                                              | 1.02 | Is the taxon harvested in the wild and likely to be sold or used in its live form?            | No       | There are no records on this.                                                                                                                                                                                                                                                                                                                                                                | High       |
| 3                                              | 1.03 | Does the taxon have invasive races, varieties, sub-taxa or congeners?                         | No       | There are no records on invasive species taxonomically close to C. reticulatus.                                                                                                                                                                                                                                                                                                              | High       |
| 2. Climate, distribution and introduction risk |      |                                                                                               |          |                                                                                                                                                                                                                                                                                                                                                                                              |            |
| 4                                              | 2.01 | How similar are the climatic conditions of the RA area and the taxon's native range?          | High     | Considering the climate classification system of Köppen-Geiger for the native range of C. reticulatus and the classification of Cropper (2013) for Madeira, and keeping in mind that C. reticulatus has a circumglobal distribution, from warm temperate to tropical waters (including the Eastern Atlantic from Capo Blanco to Angola), Madeira fits in the native range of C. reticulatus. | High       |

|                                               |      |                                                                                                                                                                         |        |                                                                                                                                                                                                                                                                                                                                                                          |           |
|-----------------------------------------------|------|-------------------------------------------------------------------------------------------------------------------------------------------------------------------------|--------|--------------------------------------------------------------------------------------------------------------------------------------------------------------------------------------------------------------------------------------------------------------------------------------------------------------------------------------------------------------------------|-----------|
| 5                                             | 2.02 | What is the quality of the climate matching data?                                                                                                                       | Medium | The climatic data was established by the classification system of Köppen-Geiger (native range) and the classification of Cropper 2013 (Madeira).                                                                                                                                                                                                                         | Medium    |
| 6                                             | 2.03 | Is the taxon already present outside of captivity in the RA area?                                                                                                       | n.a.   | Chilomycterus reticulatus is not present in captivity in Madeira.                                                                                                                                                                                                                                                                                                        | Very high |
| 7                                             | 2.04 | How many potential pathways could the taxon use to enter in the RA area?                                                                                                | >1     | C. reticulatus may enter Madeira rafting under surface debris or sargassum, and larval or post-larval phase transported by ballast water (Afonso et al. 2013).                                                                                                                                                                                                           | Medium    |
| 8                                             | 2.05 | Is the taxon currently found in close proximity to, and likely to enter into, the RA area in the near future (e.g. unintentional and intentional introductions)?        | Yes    | Some records of Chilomycterus reticulatus were collected in Madeira over the years. Some individuals are deposited in the Museu Municipal do Funchal and in the Natural History Museum of London (Wirtz et al. 2008).                                                                                                                                                    | Very high |
| <b>3. Invasive elsewhere</b>                  |      |                                                                                                                                                                         |        |                                                                                                                                                                                                                                                                                                                                                                          |           |
| 9                                             | 3.01 | Has the taxon become naturalised (established viable populations) outside its native range?                                                                             | Yes    | Chilomycterus reticulatus became naturalised outside its native range, e.g. in El Hierro (Canary Islands), the species established viable populations. It has been widespread since at least the late 1980s (Brito and Falcón 1990).                                                                                                                                     | Very high |
| 10                                            | 3.02 | In the taxon's introduced range, are there known adverse impacts to wild stocks or commercial taxa?                                                                     | No     | No information is available on the impact of this species on wild stock or commercial taxa in its introduced range.                                                                                                                                                                                                                                                      | Medium    |
| 11                                            | 3.03 | In the taxon's introduced range, are there known adverse impacts to aquaculture?                                                                                        | No     | No records are available on the adverse impact of C. reticulatus on aquaculture in its introduced range.                                                                                                                                                                                                                                                                 | High      |
| 12                                            | 3.04 | In the taxon's introduced range, are there known adverse impacts to ecosystem services?                                                                                 | No     | No information is available on the adverse impact of C. reticulatus on ecosystem services in its introduced range.                                                                                                                                                                                                                                                       | Medium    |
| 13                                            | 3.05 | In the taxon's introduced range, are there known adverse socio-economic impacts?                                                                                        | No     | No information is available on adverse socio-economic impacts by C. reticulatus in its introduced range.                                                                                                                                                                                                                                                                 | Medium    |
| <b>B. Biology/Ecology</b>                     |      |                                                                                                                                                                         |        |                                                                                                                                                                                                                                                                                                                                                                          |           |
| <b>4. Undesirable (or persistence) traits</b> |      |                                                                                                                                                                         |        |                                                                                                                                                                                                                                                                                                                                                                          |           |
| 14                                            | 4.01 | Is it likely that the taxon will be poisonous, or pose other risks to human health?                                                                                     | Yes    | Chilomycterus reticulatus has an inflatable body covered by numerous spines that may cause pain to humans.                                                                                                                                                                                                                                                               | High      |
| 15                                            | 4.02 | Is it likely that the taxon will smother one or more native taxa (that are not threatened or protected)?                                                                | No     | No information is available.                                                                                                                                                                                                                                                                                                                                             | High      |
| 16                                            | 4.03 | Are there threatened or protected taxa that the non-native taxon would parasitise in the RA area?                                                                       | No     | No information is available on that.                                                                                                                                                                                                                                                                                                                                     | High      |
| 17                                            | 4.04 | Is the taxon adaptable in terms of climatic and other environmental conditions, thus enhancing its potential persistence if it has invaded or could invade the RA area? | Yes    | Chilomycterus reticulatus has a circumglobal distribution in tropical, subtropical, and warm temperate areas of the Pacific, Indian and Atlantic oceans (Leis et al. 2015). That means that the species is adaptable to different environmental conditions, and the subtropical climate of Madeira makes the Island adequate for C. reticulatus persistence in the area. | High      |
| 18                                            | 4.05 | Is the taxon likely to disrupt food-web structure/function in aquatic ecosystems it has or is likely to invade in the RA area?                                          | No     | No information is available on the negative impact of C. reticulatus on food-web structure and/or function.                                                                                                                                                                                                                                                              | Medium    |

|                          |      |                                                                                                                                                           |      |                                                                                                                                                                                                                                                                                                                            |           |
|--------------------------|------|-----------------------------------------------------------------------------------------------------------------------------------------------------------|------|----------------------------------------------------------------------------------------------------------------------------------------------------------------------------------------------------------------------------------------------------------------------------------------------------------------------------|-----------|
| 19                       | 4.06 | Is the taxon likely to exert adverse impacts on ecosystem services in the RA area?                                                                        | No   | No information is available on the negative impact of <i>C. reticulatus</i> on ecosystem services in Madeira.                                                                                                                                                                                                              | Medium    |
| 20                       | 4.07 | Is it likely that the taxon will host, and/or act as a vector for, recognised pests and infectious agents that are endemic in the RA area?                | No   | No information is available on <i>C. reticulatus</i> as a vector for pests or infectious agents endemic in Madeira.                                                                                                                                                                                                        | Low       |
| 21                       | 4.08 | Is it likely that the taxon will host, and/or act as a vector for, recognised pests and infectious agents that are absent from (novel to) the RA area?    | Yes  | <i>Chilomycterus reticulatus</i> is known to host several parasites, including four opisthobolines (Martin et al. 2018), a cymothoid isopod (Nagasawa and Doi 2012; Nagasawa and Uyeno, 2012), and a copepod (Uyeno and Nagasawa 2009) from Japan (all) and Senegal (the copepod <i>Hatschekia legouli</i> ; Jones, 1985). | High      |
| 22                       | 4.09 | Is it likely that the taxon will achieve a body size that will make it more likely to be released from captivity?                                         | n.a. | <i>Chilomycterus reticulatus</i> is not subject to captivity.                                                                                                                                                                                                                                                              | High      |
| 23                       | 4.10 | Is the taxon capable of sustaining itself in a range of water velocity conditions (e.g. versatile in habitat use)?                                        | Yes  | Juveniles of <i>C. reticulatus</i> are pelagic in ocean surface waters (Lieske and Myers 2002), so I suppose that they can sustain themselves in a range of water velocity conditions, at least when young.                                                                                                                | Low       |
| 24                       | 4.11 | Is it likely that the taxon's mode of existence (e.g. excretion of by-products) or behaviours (e.g. feeding) will reduce habitat quality for native taxa? | No   | No information is available on habitat quality reduction by <i>C. reticulatus</i> for native taxa.                                                                                                                                                                                                                         | Medium    |
| 25                       | 4.12 | Is the taxon likely to maintain a viable population even when present in low densities (or persisting in adverse conditions by way of a dormant form)?    | Yes  | The species is likely to maintain viable population even if present in low densities (e.g. Brito and Falcón 1990; Espino et al. 2019)                                                                                                                                                                                      | Very high |
| 5. Resource exploitation |      |                                                                                                                                                           |      |                                                                                                                                                                                                                                                                                                                            |           |
| 26                       | 5.01 | Is the taxon likely to consume threatened or protected native taxa in RA area?                                                                            | No   | <i>Chilomycterus reticulatus</i> feeds on hard-shelled invertebrates, but none of the stomach contents analysed by Brito and Falcón (1990) belong to threatened or protected native taxa of Madeira.                                                                                                                       | Low       |
| 27                       | 5.02 | Is the taxon likely to sequester food resources (including nutrients) to the detriment of native taxa in the RA area?                                     | No   | No information is available on sequestering food resources by <i>C. reticulatus</i> .                                                                                                                                                                                                                                      | Medium    |
| 6. Reproduction          |      |                                                                                                                                                           |      |                                                                                                                                                                                                                                                                                                                            |           |
| 28                       | 6.01 | Is the taxon likely to exhibit parental care and/or to reduce age-at-maturity in response to environmental conditions?                                    | No   | <i>Chilomycterus reticulatus</i> doesn't exhibit parental care (Almada et al. 1999), while no information is available on age at maturity reduction in response to environmental conditions.                                                                                                                               | High      |
| 29                       | 6.02 | Is the taxon likely to produce viable gametes or propagules (in the RA area)?                                                                             | Yes  | Madeira has a subtropical climate that falls in the environmental conditions of the native range of <i>C. reticulatus</i> .                                                                                                                                                                                                | High      |
| 30                       | 6.03 | Is the taxon likely to hybridize naturally with native taxa?                                                                                              | No   | No information is available on <i>C. reticulatus</i> . Other <i>Chilomycterus</i> species were hybridized between them, but only in captivity (Doi et al. 2015).                                                                                                                                                           | High      |
| 31                       | 6.04 | Is the taxon likely to be hermaphroditic or to display asexual reproduction?                                                                              | No   | No information is available on asexual reproduction or hermaphroditism of <i>C. reticulatus</i> .                                                                                                                                                                                                                          | Medium    |
| 32                       | 6.05 | Is the taxon dependent on the presence of another taxon (or specific habitat features) to complete its life cycle?                                        | No   | No information is available on the need for other taxa to complete the life cycle of <i>C. reticulatus</i> , and the preferential spawning ground is unknown (De Andrade et al. 2016).                                                                                                                                     | Medium    |

|                         |      |                                                                                                                                                                                           |      |                                                                                                                                                                                                                                                                                    |           |
|-------------------------|------|-------------------------------------------------------------------------------------------------------------------------------------------------------------------------------------------|------|------------------------------------------------------------------------------------------------------------------------------------------------------------------------------------------------------------------------------------------------------------------------------------|-----------|
| 33                      | 6.06 | Is the taxon known (or likely) to produce a large number of propagules or offspring within a short time span (e.g. <1 year)?                                                              | Yes  | No information is available on the reproduction of <i>C. reticulatus</i> . However, a study conducted on another species belonging to the same family ( <i>Diodon holocanthus</i> ) showed that this species could reproduce more than once per year (Lucano-Ramírez et al. 2011). | Low       |
| 34                      | 6.07 | How many time units (days, months, years) does the taxon require to reach the age-at-first-reproduction? [In the Justification field, indicate the relevant time unit being used.]        | n.a. | There is no information on the age at the first reproduction of <i>C. reticulatus</i> .                                                                                                                                                                                            | High      |
| 7. Dispersal mechanisms |      |                                                                                                                                                                                           |      |                                                                                                                                                                                                                                                                                    |           |
| 35                      | 7.01 | How many potential internal pathways could the taxon use to disperse within the RA area (with suitable habitats nearby)?                                                                  | >1   | <i>Chilomycterus reticulatus</i> could disperse within the Madeira area through ballast water (larvae or post-larvae) and rafting on floating objects or <i>Sargassum</i> sp. (juvenile/adult) (Afonso et al. 2013).                                                               | High      |
| 36                      | 7.02 | Will any of these pathways bring the taxon in close proximity to one or more protected areas (e.g. MCZ, MPA, SSSI)?                                                                       | Yes  | In Madeira, there are some MPAs, and a couple (Cabo Girão and Garajau) are close to Funchal, the island's capital, characterized by the highest shipping traffic.                                                                                                                  | High      |
| 37                      | 7.03 | Does the taxon have a means of actively attaching itself to hard substrata (e.g. ship hulls, pilings, buoys) such that it enhances the likelihood of dispersal?                           | No   | No information is available on it.                                                                                                                                                                                                                                                 | High      |
| 38                      | 7.04 | Is natural dispersal of the taxon likely to occur as eggs (for animals) or as propagules (for plants: seeds, spores) in the RA area?                                                      | Yes  | Eggs of <i>C. reticulatus</i> are pelagic and drift in surface oceanic water (Luiz et al. 2012).                                                                                                                                                                                   | High      |
| 39                      | 7.05 | Is natural dispersal of the taxon likely to occur as larvae/juveniles (for animals) or as fragments/seedlings (for plants) in the RA area?                                                | Yes  | Larvae of <i>C. reticularis</i> are pelagic and mostly disperse through rafting (Afonso et al. 2013), and commonly juveniles are associated with floating weeds (Kuitert and Tono-zuka 2001).                                                                                      | Very high |
| 40                      | 7.06 | Are older life stages of the taxon likely to migrate in the RA area for reproduction?                                                                                                     | No   | No evidence is available on that.                                                                                                                                                                                                                                                  | Low       |
| 41                      | 7.07 | Are propagules or eggs of the taxon likely to be dispersed in the RA area by other animals?                                                                                               | No   | No information is available, but the larvae of <i>C. reticulatus</i> are pelagic, so probably the dispersal does not involve other animals.                                                                                                                                        | Medium    |
| 42                      | 7.08 | Is dispersal of the taxon along any of the pathways mentioned in the previous seven questions (7.01–7.07; i.e. both unintentional or intentional) likely to be rapid?                     | Yes  | Since eggs or larvae of <i>C. reticulatus</i> can arrive in Madeira through ballast water, this vector can be considered rapid (< 1 year).                                                                                                                                         | Medium    |
| 43                      | 7.09 | Is dispersal of the taxon density dependent?                                                                                                                                              | No   | No information is available on that.                                                                                                                                                                                                                                               | Low       |
| 8. Tolerance attributes |      |                                                                                                                                                                                           |      |                                                                                                                                                                                                                                                                                    |           |
| 44                      | 8.01 | Is the taxon able to withstand being out of water for extended periods (e.g. minimum of one or more hours) at some stage of its life cycle?                                               | No   | No information is available on that.                                                                                                                                                                                                                                               | Low       |
| 45                      | 8.02 | Is the taxon tolerant of a wide range of water quality conditions relevant to that taxon? [In the Justification field, indicate the relevant water quality variable(s) being considered.] | n.a. | No information is available on that.                                                                                                                                                                                                                                               | High      |

|                          |      |                                                                                                                                                              |           |                                                                                                                                                                                                                                                                                                                                                                                      |        |
|--------------------------|------|--------------------------------------------------------------------------------------------------------------------------------------------------------------|-----------|--------------------------------------------------------------------------------------------------------------------------------------------------------------------------------------------------------------------------------------------------------------------------------------------------------------------------------------------------------------------------------------|--------|
| 46                       | 8.03 | Can the taxon be controlled or eradicated in the wild with chemical, biological, or other agents/means?                                                      | No        | No information is available on that.                                                                                                                                                                                                                                                                                                                                                 | Medium |
| 47                       | 8.04 | Is the taxon likely to tolerate or benefit from environmental/human disturbance?                                                                             | No        | No information is available on that.                                                                                                                                                                                                                                                                                                                                                 | Medium |
| 48                       | 8.05 | Is the taxon able to tolerate salinity levels that are higher or lower than those found in its usual environment?                                            | No        | Chilomycterus reticulatus is classified as marine stenohaline in González-Acosta et al. (2018). In De Andrade et al. (2016) is classified as Euryhaline Marine. Still, the reference (Vilar et al. 2011) is about another species of the same genus, C. spinosus spinosus, that rarely was found in the estuary of Baía da Babitonga.                                                | High   |
| 49                       | 8.06 | Are there effective natural enemies (predators) of the taxon present in the RA area?                                                                         | No        | No predators or natural enemies of C. reticulatus seem to be present in Madeira.                                                                                                                                                                                                                                                                                                     | Medium |
| <b>C. Climate change</b> |      |                                                                                                                                                              |           |                                                                                                                                                                                                                                                                                                                                                                                      |        |
| 9. Climate change        |      |                                                                                                                                                              |           |                                                                                                                                                                                                                                                                                                                                                                                      |        |
| 50                       | 9.01 | Under the predicted future climatic conditions, are the risks of entry into the RA area posed by the taxon likely to increase, decrease or not change?       | Increase  | Several marine organisms expanded their distribution ranges in recent decades due to ocean warming, as happened for C. reticulatus in the Canary Islands (Espino et al. 2019).                                                                                                                                                                                                       | High   |
| 51                       | 9.02 | Under the predicted future climatic conditions, are the risks of establishment posed by the taxon likely to increase, decrease or not change?                | Increase  | In Gran Canaria (Canary Islands), the increase in C. reticulatus in recent decades seems to be related to the rise in SST registered in the area, facilitating the range expansion and the establishment of the species (Espino et al. 2019).                                                                                                                                        | High   |
| 52                       | 9.03 | Under the predicted future climatic conditions, are the risks of dispersal within the RA area posed by the taxon likely to increase, decrease or not change? | Increase  | In Gran Canaria (Canary Islands), the increase in C. reticulatus in recent decades seems to be related to the increase of SST registered in the area, facilitating the dispersal of the species within the Island of Gran Canaria (Espino et al. 2019).                                                                                                                              | High   |
| 53                       | 9.04 | Under the predicted future climatic conditions, what is the likely magnitude of future potential impacts on biodiversity and/or ecological integrity/status? | No change | Chilomycterus reticulatus could impact the biodiversity and ecological status of the coast, eating the key herbivore species of sea urchin of Madeira (Diadema africanum) and thus reducing the urchin barren favoring the recovery of macroalgae. However, this should not increase or decrease due to climate changes.                                                             | High   |
| 54                       | 9.05 | Under the predicted future climatic conditions, what is the likely magnitude of future potential impacts on ecosystem structure and/or function?             | No change | Climate change should not increase or decrease the low impact of C. reticulatus on ecosystem structure or function.                                                                                                                                                                                                                                                                  | Medium |
| 55                       | 9.06 | Under the predicted future climatic conditions, what is the likely magnitude of future potential impacts on ecosystem services/socio-economic factors?       | Lower     | Climate change could cause an increase in the abundance of C. reticulatus. Thus consequently, it should impact the population of the key herbivore species of sea urchin Diadema africanum, reducing it. A reduction of D. africanum would reduce the barren state highly present in Madeira, favoring the repopulation of macro algae and consequently the associated biodiversity. | Medium |

| Scores                                         |           |
|------------------------------------------------|-----------|
| BRA Score                                      | 7.0       |
| BRA Outcome                                    | Medium    |
| BRA+CCA Score                                  | 11.0      |
| BRA+CCA Outcome                                | Medium    |
| Score partition                                |           |
| <b>A. Biogeography/Historical</b>              | <b>1</b>  |
| 1. Domestication/Cultivation                   | -2        |
| 2. Climate, distribution and introduction risk | 1         |
| 3. Invasive elsewhere                          | 2         |
| <b>B. Biology/Ecology</b>                      | <b>6</b>  |
| 4. Undesirable (or persistence) traits         | 5         |
| 5. Resource exploitation                       | 0         |
| 6. Reproduction                                | 1         |
| 7. Dispersal mechanisms                        | 2         |
| 8. Tolerance attributes                        | -2        |
| <b>C. Climate change</b>                       | <b>4</b>  |
| 9. Climate change                              | 4         |
| Answered Questions                             |           |
| <b>Total</b>                                   | <b>55</b> |
| <b>A. Biogeography/Historical</b>              | <b>13</b> |
| 1. Domestication/Cultivation                   | 3         |
| 2. Climate, distribution and introduction risk | 5         |
| 3. Invasive elsewhere                          | 5         |
| <b>B. Biology/Ecology</b>                      | <b>36</b> |
| 4. Undesirable (or persistence) traits         | 12        |
| 5. Resource exploitation                       | 2         |
| 6. Reproduction                                | 7         |

| Thresholds          |      |
|---------------------|------|
| BRA                 | 12.5 |
| BRA+CCA             | 23.4 |
| Confidence          |      |
| BRA+CCA             | 0.63 |
| BRA                 | 0.62 |
| CCA                 | 0.67 |
| Date and Time       |      |
| 23.07.2021 10:00:29 |      |

|                                       |          |
|---------------------------------------|----------|
| 7. Dispersal mechanisms               | 9        |
| 8. Tolerance attributes               | 6        |
| <b>C. Climate change</b>              | <b>6</b> |
| 9. Climate change                     | 6        |
| <b>Sectors affected</b>               |          |
| Commercial                            | 0        |
| Environmental                         | 1        |
| Species or population nuisance traits | 14       |

### Assessment #3

| Taxon and Assessor details         |                                                                                                                                                                                                                                                                                                                                                     |
|------------------------------------|-----------------------------------------------------------------------------------------------------------------------------------------------------------------------------------------------------------------------------------------------------------------------------------------------------------------------------------------------------|
| Category                           | Fishes and Lampreys (marine)                                                                                                                                                                                                                                                                                                                        |
| Taxon name                         | Chilomycterus reticulatus                                                                                                                                                                                                                                                                                                                           |
| Common name                        | Spotfin burrfish                                                                                                                                                                                                                                                                                                                                    |
| Assessor                           | Nuno Castro                                                                                                                                                                                                                                                                                                                                         |
| Risk screening context             |                                                                                                                                                                                                                                                                                                                                                     |
| Reason and socio-economic benefits | Chilomycterus reticulatus has colonized the neighbouring archipelago of Canary Islands, sporadic sightings of the species have occurred in the RA (Madeira). The main prey item for C. reticulatus is hard shell bivalves, so it is important to verify the risk of establishment to prevent impact on important resources in the RA (i.e. Limpets) |
| Risk assessment area               | Madeira                                                                                                                                                                                                                                                                                                                                             |
| Taxonomy                           | Biota Animalia (Kingdom) Chordata (Phylum) Vertebrata (Subphylum) Gnathostomata (Superclass) Pisces (Superclass) Actinopterygii (Class) Tetraodontiformes (Order) Diodontidae (Family)                                                                                                                                                              |
| Native range                       | Circumglobal (Tropical) : Gulf of Mexico, Atlantic, Indian and Pacific oceans.                                                                                                                                                                                                                                                                      |
| Introduced range                   | Mediterranean; Canary Islands; Madeira?                                                                                                                                                                                                                                                                                                             |
| URL                                | <a href="http://www.marinespecies.org/aphia.php?p=taxdetails&amp;id=219964">http://www.marinespecies.org/aphia.php?p=taxdetails&amp;id=219964</a>                                                                                                                                                                                                   |

|                                                |      |                                                                                               | Response | Justification (references and/or other information)          | Confidence |
|------------------------------------------------|------|-----------------------------------------------------------------------------------------------|----------|--------------------------------------------------------------|------------|
| A. Biogeography/Historical                     |      |                                                                                               |          |                                                              |            |
| 1. Domestication/Cultivation                   |      |                                                                                               |          |                                                              |            |
| 1                                              | 1.01 | Has the taxon been the subject of domestication (or cultivation) for at least 20 generations? | No       | No record of that                                            | High       |
| 2                                              | 1.02 | Is the taxon harvested in the wild and likely to be sold or used in its live form?            | Yes      | In Brazil, I've witnessed that this fish is often sold dried | High       |
| 3                                              | 1.03 | Does the taxon have invasive races, varieties, sub-taxa or congeners?                         | No       | No record of that                                            | High       |
| 2. Climate, distribution and introduction risk |      |                                                                                               |          |                                                              |            |
| 4                                              | 2.01 | How similar are the climatic conditions of the RA area and the taxon's native range?          | Medium   | According to Climatch the similarity is 6.76/10              | Medium     |

|                                        |      |                                                                                                                                                                         |        |                                                                                                                                                |           |
|----------------------------------------|------|-------------------------------------------------------------------------------------------------------------------------------------------------------------------------|--------|------------------------------------------------------------------------------------------------------------------------------------------------|-----------|
| 5                                      | 2.02 | What is the quality of the climate matching data?                                                                                                                       | Medium | The quality was based on the online model, the number of source stations selected was high, but the target region had only 3 points available. | Medium    |
| 6                                      | 2.03 | Is the taxon already present outside of captivity in the RA area?                                                                                                       | n.a.   | There is some evidence of the presence of the species (Wirtz et al., 2008)                                                                     | High      |
| 7                                      | 2.04 | How many potential pathways could the taxon use to enter in the RA area?                                                                                                | >1     | Ballast water and association with floating marine litter (Sommer et al 1996; Espino et al., 2015).                                            | High      |
| 8                                      | 2.05 | Is the taxon currently found in close proximity to, and likely to enter into, the RA area in the near future (e.g. unintentional and intentional introductions)?        | Yes    | There is documentation of geographical range expansion of the organism in question: Espino et al., 2019.                                       | Very high |
| 3. Invasive elsewhere                  |      |                                                                                                                                                                         |        |                                                                                                                                                |           |
| 9                                      | 3.01 | Has the taxon become naturalised (established viable populations) outside its native range?                                                                             | Yes    | There is evidence that the species established viable populations outside its native range: Espino et al., 2019.                               | High      |
| 10                                     | 3.02 | In the taxon's introduced range, are there known adverse impacts to wild stocks or commercial taxa?                                                                     | No     | No known adverse impacts to wild stock or commercial taxa                                                                                      | Medium    |
| 11                                     | 3.03 | In the taxon's introduced range, are there known adverse impacts to aquaculture?                                                                                        | Yes    | The fish can host a parasite that could cause adverse impacts on aquaculture                                                                   | High      |
| 12                                     | 3.04 | In the taxon's introduced range, are there known adverse impacts to ecosystem services?                                                                                 | No     | No documented adverse impacts on ecosystem services                                                                                            | Medium    |
| 13                                     | 3.05 | In the taxon's introduced range, are there known adverse socio-economic impacts?                                                                                        | No     | No documented socio-economic impacts                                                                                                           | Medium    |
| B. Biology/Ecology                     |      |                                                                                                                                                                         |        |                                                                                                                                                |           |
| 4. Undesirable (or persistence) traits |      |                                                                                                                                                                         |        |                                                                                                                                                |           |
| 14                                     | 4.01 | Is it likely that the taxon will be poisonous, or pose other risks to human health?                                                                                     | Yes    | The species possess spines that can be harmful to humans                                                                                       | High      |
| 15                                     | 4.02 | Is it likely that the taxon will smother one or more native taxa (that are not threatened or protected)?                                                                | No     | No record of that                                                                                                                              | High      |
| 16                                     | 4.03 | Are there threatened or protected taxa that the non-native taxon would parasitise in the RA area?                                                                       | No     | No record of that                                                                                                                              | High      |
| 17                                     | 4.04 | Is the taxon adaptable in terms of climatic and other environmental conditions, thus enhancing its potential persistence if it has invaded or could invade the RA area? | Yes    | Since the native distribution of the taxa is similar to the RA, there is a potential for the species to invade the RA area                     | Medium    |
| 18                                     | 4.05 | Is the taxon likely to disrupt food-web structure/function in aquatic ecosystems it has or is likely to invade in the RA area?                                          | No     | No record of that                                                                                                                              | Medium    |
| 19                                     | 4.06 | Is the taxon likely to exert adverse impacts on ecosystem services in the RA area?                                                                                      | No     | No record of that                                                                                                                              | Medium    |

|                          |      |                                                                                                                                                                                    |      |                                                                                                                                                                                                                          |        |
|--------------------------|------|------------------------------------------------------------------------------------------------------------------------------------------------------------------------------------|------|--------------------------------------------------------------------------------------------------------------------------------------------------------------------------------------------------------------------------|--------|
| 20                       | 4.07 | Is it likely that the taxon will host, and/or act as a vector for, recognised pests and infectious agents that are endemic in the RA area?                                         | Yes  | Tetrodotoxin is present in the liver of <i>C. reticulatus</i> . Nagashima et al., 2018                                                                                                                                   | Medium |
| 21                       | 4.08 | Is it likely that the taxon will host, and/or act as a vector for, recognised pests and infectious agents that are absent from (novel to) the RA area?                             | Yes  | The taxon is known to host an isopod parasite, Nagasawa and Doi, 2012.                                                                                                                                                   | Medium |
| 22                       | 4.09 | Is it likely that the taxon will achieve a body size that will make it more likely to be released from captivity?                                                                  | No   | No record of that                                                                                                                                                                                                        | Medium |
| 23                       | 4.10 | Is the taxon capable of sustaining itself in a range of water velocity conditions (e.g. versatile in habitat use)?                                                                 | Yes  | My reply is based on the capacity of the fish to endure oceanic surface waters (Sommer el al.,1996 but regarding the taxa swimming performance my inclination is to no response, so the confidence is low (Blake, 2004). | Low    |
| 24                       | 4.11 | Is it likely that the taxon's mode of existence (e.g. excretion of by-products) or behaviours (e.g. feeding) will reduce habitat quality for native taxa?                          | No   | No record of that                                                                                                                                                                                                        | Medium |
| 25                       | 4.12 | Is the taxon likely to maintain a viable population even when present in low densities (or persisting in adverse conditions by way of a dormant form)?                             | Yes  | Evidence of that was found in other regions (Espino et l., 2019)                                                                                                                                                         | High   |
| 5. Resource exploitation |      |                                                                                                                                                                                    |      |                                                                                                                                                                                                                          |        |
| 26                       | 5.01 | Is the taxon likely to consume threatened or protected native taxa in RA area?                                                                                                     | No   | The taxa feed on hardshell invertebrates( Follesa et al. 2009) but Brito et al. (1990) analyzing stomach contents of the species did not find any threatened or protected native taxa to the RA area.                    | High   |
| 27                       | 5.02 | Is the taxon likely to sequester food resources (including nutrients) to the detriment of native taxa in the RA area?                                                              | No   | No record of that                                                                                                                                                                                                        | Medium |
| 6. Reproduction          |      |                                                                                                                                                                                    |      |                                                                                                                                                                                                                          |        |
| 28                       | 6.01 | Is the taxon likely to exhibit parental care and/or to reduce age-at-maturity in response to environmental conditions?                                                             | No   | No record of that                                                                                                                                                                                                        | High   |
| 29                       | 6.02 | Is the taxon likely to produce viable gametes or propagules (in the RA area)?                                                                                                      | Yes  | The RA is similar in conditions to the native range of the taxon                                                                                                                                                         | High   |
| 30                       | 6.03 | Is the taxon likely to hybridize naturally with native taxa?                                                                                                                       | No   | No record of hybridization in natural conditions only in captivity (Doi et al., 2015)                                                                                                                                    | High   |
| 31                       | 6.04 | Is the taxon likely to be hermaphroditic or to display asexual reproduction?                                                                                                       | No   | No record of that                                                                                                                                                                                                        | High   |
| 32                       | 6.05 | Is the taxon dependent on the presence of another taxon (or specific habitat features) to complete its life cycle?                                                                 | No   | No record of that                                                                                                                                                                                                        | High   |
| 33                       | 6.06 | Is the taxon known (or likely) to produce a large number of propagules or offspring within a short time span (e.g. <1 year)?                                                       | No   | There is not much information available regarding the reproduction of this species                                                                                                                                       | Medium |
| 34                       | 6.07 | How many time units (days, months, years) does the taxon require to reach the age-at-first-reproduction? [In the Justification field, indicate the relevant time unit being used.] | n.a. | No record of age of first reproduction                                                                                                                                                                                   | Medium |
| 7. Dispersal mechanisms  |      |                                                                                                                                                                                    |      |                                                                                                                                                                                                                          |        |

|                         |      |                                                                                                                                                                                           |     |                                                                                                                                   |           |
|-------------------------|------|-------------------------------------------------------------------------------------------------------------------------------------------------------------------------------------------|-----|-----------------------------------------------------------------------------------------------------------------------------------|-----------|
| 35                      | 7.01 | How many potential internal pathways could the taxon use to disperse within the RA area (with suitable habitats nearby)?                                                                  | >1  | Ballast water (eggs) associated with floating marine litter (Luiz et al., 2015)                                                   | High      |
| 36                      | 7.02 | Will any of these pathways bring the taxon in close proximity to one or more protected areas (e.g. MCZ, MPA, SSSI)?                                                                       | Yes | There is ship traffic around MPAs in the RA                                                                                       | Very high |
| 37                      | 7.03 | Does the taxon have a means of actively attaching itself to hard substrata (e.g. ship hulls, pilings, buoys) such that it enhances the likelihood of dispersal?                           | No  | No record of that                                                                                                                 | Medium    |
| 38                      | 7.04 | Is natural dispersal of the taxon likely to occur as eggs (for animals) or as propagules (for plants: seeds, spores) in the RA area?                                                      | Yes | Eggs and juveniles are pelagic, drifting in surface oceanic waters to about 20 cm of standard total (Luiz et al., 2015)           | Very high |
| 39                      | 7.05 | Is natural dispersal of the taxon likely to occur as larvae/juveniles (for animals) or as fragments/seedlings (for plants) in the RA area?                                                | Yes | Eggs and juveniles are pelagic, drifting in surface oceanic waters to about 20 cm of standard total length. (Sommer et al., 1996) | Very high |
| 40                      | 7.06 | Are older life stages of the taxon likely to migrate in the RA area for reproduction?                                                                                                     | Yes | Since juveniles are pelagic (Sommer et al., 1996), they might migrate (although evidence found of migration behaviour)            | Low       |
| 41                      | 7.07 | Are propagules or eggs of the taxon likely to be dispersed in the RA area by other animals?                                                                                               | No  | No evidence of that                                                                                                               | Medium    |
| 42                      | 7.08 | Is dispersal of the taxon along any of the pathways mentioned in the previous seven questions (7.01–7.07; i.e. both unintentional or intentional) likely to be rapid?                     | No  | No evidence of that                                                                                                               | Medium    |
| 43                      | 7.09 | Is dispersal of the taxon density dependent?                                                                                                                                              | No  | No evidence of that                                                                                                               | Medium    |
| 8. Tolerance attributes |      |                                                                                                                                                                                           |     |                                                                                                                                   |           |
| 44                      | 8.01 | Is the taxon able to withstand being out of water for extended periods (e.g. minimum of one or more hours) at some stage of its life cycle?                                               | No  | I believe that this taxon cannot withstand being out of water for long periods                                                    | Medium    |
| 45                      | 8.02 | Is the taxon tolerant of a wide range of water quality conditions relevant to that taxon? [In the Justification field, indicate the relevant water quality variable(s) being considered.] | No  | No record to that                                                                                                                 | Medium    |
| 46                      | 8.03 | Can the taxon be controlled or eradicated in the wild with chemical, biological, or other agents/means?                                                                                   | No  | No record of that                                                                                                                 | Medium    |
| 47                      | 8.04 | Is the taxon likely to tolerate or benefit from environmental/human disturbance?                                                                                                          | No  | No record of this evidence                                                                                                        | Medium    |
| 48                      | 8.05 | Is the taxon able to tolerate salinity levels that are higher or lower than those found in its usual environment?                                                                         | No  | No record to support this statement                                                                                               | Medium    |
| 49                      | 8.06 | Are there effective natural enemies (predators) of the taxon present in the RA area?                                                                                                      | No  | I couldn't find natural predators in the RA of the taxon                                                                          | Low       |
| C. Climate change       |      |                                                                                                                                                                                           |     |                                                                                                                                   |           |
| 9. Climate change       |      |                                                                                                                                                                                           |     |                                                                                                                                   |           |

|    |      |                                                                                                                                                              |          |                                                                                                                                                                                                                                                                                                                                                                                      |        |
|----|------|--------------------------------------------------------------------------------------------------------------------------------------------------------------|----------|--------------------------------------------------------------------------------------------------------------------------------------------------------------------------------------------------------------------------------------------------------------------------------------------------------------------------------------------------------------------------------------|--------|
| 50 | 9.01 | Under the predicted future climatic conditions, are the risks of entry into the RA area posed by the taxon likely to increase, decrease or not change?       | Increase | There are other similar cases (Espino et al., 2015; Schäfer et al., 2019).                                                                                                                                                                                                                                                                                                           | High   |
| 51 | 9.02 | Under the predicted future climatic conditions, are the risks of establishment posed by the taxon likely to increase, decrease or not change?                | Increase | Over the years, the taxon has increased their number in a nearby area: doi:10.3390/d11120230; other species in the RA have established self-sustained populations (Alves and Alves, 2002)                                                                                                                                                                                            | High   |
| 52 | 9.03 | Under the predicted future climatic conditions, are the risks of dispersal within the RA area posed by the taxon likely to increase, decrease or not change? | Increase | There is evidence of undergoing climate change in the RA that could increase the risk of dispersal of the taxon: Schäfer et al., 2019).                                                                                                                                                                                                                                              | High   |
| 53 | 9.04 | Under the predicted future climatic conditions, what is the likely magnitude of future potential impacts on biodiversity and/or ecological integrity/status? | Higher   | Since the selected prey item of the species is <i>Diadema africanum</i> (Brito et al., 1990), this could cause some decline in the urchin abundance. By doing so, the barren state achieved by this urchin species can be reduced, favoring the recovery of macroalgae (Gizzi et al., 2021)                                                                                          | Medium |
| 54 | 9.05 | Under the predicted future climatic conditions, what is the likely magnitude of future potential impacts on ecosystem structure and/or function?             | Higher   | <i>C. reticulatus</i> can impact the ecosystem structure and function, by eating <i>Diadema africanum</i> (Brito et al., 1990), this could cause some decline in the urchin abundance. By doing so, the barren state achieved by this urchin species can be reduced, favoring the recovery of macroalgae (Gizzi et al., 2021) and associated species.                                | Medium |
| 55 | 9.06 | Under the predicted future climatic conditions, what is the likely magnitude of future potential impacts on ecosystem services/socio-economic factors?       | Higher   | <i>C. reticulatus</i> can impact the ecosystem services/socio-economic factors, by eating <i>Diadema africanum</i> (Brito et al., 1990), this could cause some decline in the urchin abundance. By doing so, the barren state achieved by this urchin species can be reduced, favoring the recovery of macroalgae (Gizzi et al., 2021) and providing higher associated biodiversity. | Medium |

| Statistics                                     |      |
|------------------------------------------------|------|
| Scores                                         |      |
| BRA Score                                      | 12.5 |
| BRA Outcome                                    | High |
| BRA+CCA Score                                  | 24.5 |
| BRA+CCA Outcome                                | High |
| Score partition                                |      |
| A. Biogeography/Historical                     | 5,5  |
| 1. Domestication/Cultivation                   | 0    |
| 2. Climate, distribution and introduction risk | 1    |

| Thresholds |      |
|------------|------|
| BRA        | 12.5 |
| BRA+CCA    | 23.4 |
| Confidence |      |
| BRA+CCA    | 0.62 |
| BRA        | 0.62 |
| CCA        | 0.62 |

| Date and Time |
|---------------|
|---------------|

|                                                |             |
|------------------------------------------------|-------------|
| 3. Invasive elsewhere                          | 4,5         |
| <b>B. Biology/Ecology</b>                      | <b>7</b>    |
| 4. Undesirable (or persistence) traits         | 6           |
| 5. Resource exploitation                       | 0           |
| 6. Reproduction                                | 0           |
| 7. Dispersal mechanisms                        | 3           |
| 8. Tolerance attributes                        | -2          |
| <b>C. Climate change</b>                       | <b>12</b>   |
| 9. Climate change                              | 12          |
| <b>Answered Questions</b>                      |             |
| <b>Total</b>                                   | <b>55</b>   |
| <b>A. Biogeography/Historical</b>              | <b>13</b>   |
| 1. Domestication/Cultivation                   | 3           |
| 2. Climate, distribution and introduction risk | 5           |
| 3. Invasive elsewhere                          | 5           |
| <b>B. Biology/Ecology</b>                      | <b>36</b>   |
| 4. Undesirable (or persistence) traits         | 12          |
| 5. Resource exploitation                       | 2           |
| 6. Reproduction                                | 7           |
| 7. Dispersal mechanisms                        | 9           |
| 8. Tolerance attributes                        | 6           |
| <b>C. Climate change</b>                       | <b>6</b>    |
| 9. Climate change                              | 6           |
| <b>Sectors affected</b>                        |             |
| <b>Commercial</b>                              | <b>8</b>    |
| <b>Environmental</b>                           | <b>5</b>    |
| <b>Species or population nuisance traits</b>   | <b>14,5</b> |

03.08.2021 12:41:03

## Assessment #4

| Taxon and Assessor details         |                                                     |
|------------------------------------|-----------------------------------------------------|
| Category                           | Fishes and Lampreys (marine)                        |
| Taxon name                         | Chilomycterus reticulatus                           |
| Common name                        | Spotfin burrfish                                    |
| Assessor                           | Susanne Schaefer                                    |
| Risk screening context             |                                                     |
| Reason and socio-economic benefits |                                                     |
| Risk assessment area               | Madeira Island                                      |
| Taxonomy                           |                                                     |
| Native range                       | Circum tropical: Atlantic, Pacific and Indian Ocean |
| Introduced range                   | NE Atlantic - Madeira and Canary Islands            |
| URL                                |                                                     |

|                                                |      |                                                                                               | Response | Justification (references and/or other information)                                                                                                                                                                                                                                                                                                                           | Confidence |
|------------------------------------------------|------|-----------------------------------------------------------------------------------------------|----------|-------------------------------------------------------------------------------------------------------------------------------------------------------------------------------------------------------------------------------------------------------------------------------------------------------------------------------------------------------------------------------|------------|
| A. Biogeography/Historical                     |      |                                                                                               |          |                                                                                                                                                                                                                                                                                                                                                                               |            |
| 1. Domestication/Cultivation                   |      |                                                                                               |          |                                                                                                                                                                                                                                                                                                                                                                               |            |
| 1                                              | 1.01 | Has the taxon been the subject of domestication (or cultivation) for at least 20 generations? | No       | There is no information available on domestication or cultivation of the taxon for at least 20 generations. There might be a few cases of individuals held in aquaria around the world (commercial, scientific or private), but no evidence could be found about ongoing breeding efforts.                                                                                    | High       |
| 2                                              | 1.02 | Is the taxon harvested in the wild and likely to be sold or used in its live form?            | No       | There is no information on this taxon being harvested or sold. Pinto et al (2013) describe that local fishermen in Brazil show a lack of interest in buying or selling this taxon. There might be rare cases of the taxon being caught and consumed in some parts of the world or caught for display in aquaria, but there is no scientific documentation on these processes. | High       |
| 3                                              | 1.03 | Does the taxon have invasive races, varieties, sub-taxa or congeners?                         | No       | There are no records of this taxon or close congeners being invasive.                                                                                                                                                                                                                                                                                                         | High       |
| 2. Climate, distribution and introduction risk |      |                                                                                               |          |                                                                                                                                                                                                                                                                                                                                                                               |            |
| 4                                              | 2.01 | How similar are the climatic conditions of the RA area and the taxon's native range?          | Medium   | The taxons preferred range in temperatures is from 21.5-28°C, but can reach from 12.5-32.5°C (min-max) and salinities of 30.5-36 is preferred but can reach from 22.5-39 (based on Aquamaps: predicted range maps for aquatic species: Chilomycterus reticulatus). The                                                                                                        | High       |

|                                        |      |                                                                                                                                                                  |        |                                                                                                                                                                                                                                                                                                                                                                                                                                                                                                       |           |
|----------------------------------------|------|------------------------------------------------------------------------------------------------------------------------------------------------------------------|--------|-------------------------------------------------------------------------------------------------------------------------------------------------------------------------------------------------------------------------------------------------------------------------------------------------------------------------------------------------------------------------------------------------------------------------------------------------------------------------------------------------------|-----------|
|                                        |      |                                                                                                                                                                  |        | RA area meets both requirements, but the seasonal temperature range in the RA area (16-26°C, average 20.5°C; Schaefer et al., 2019) is at the lower end of the taxon's preferred range.                                                                                                                                                                                                                                                                                                               |           |
| 5                                      | 2.02 | What is the quality of the climate matching data?                                                                                                                | Medium | The analysis is based on only two parameters (temperature and salinity), but the data for these parameters is complete and of high confidence for the RA area. The dataset used to describe the native range is based on an automated output (therefore medium confidence) and is complete for the two considered parameters.                                                                                                                                                                         | Medium    |
| 6                                      | 2.03 | Is the taxon already present outside of captivity in the RA area?                                                                                                | Yes    | The taxon has already been recorded in the RA area "in the wild". No records were found of the taxon being held in captivity in the RA area.                                                                                                                                                                                                                                                                                                                                                          | Very high |
| 7                                      | 2.04 | How many potential pathways could the taxon use to enter in the RA area?                                                                                         | >1     | Eggs larvae and juveniles are pelagic and could be possibly transported by currents and ballast waters (Doi et al., 2015; Leis et al., 2016). Juveniles are sometimes found associated with floating algae/debris (Afonso et al., 2013).                                                                                                                                                                                                                                                              | High      |
| 8                                      | 2.05 | Is the taxon currently found in close proximity to, and likely to enter into, the RA area in the near future (e.g. unintentional and intentional introductions)? | Yes    | The taxon has already been recorded in the RA area, and other areas close by (e.g. Canary Islands; Espino et al., 2019).                                                                                                                                                                                                                                                                                                                                                                              | Very high |
| 3. Invasive elsewhere                  |      |                                                                                                                                                                  |        |                                                                                                                                                                                                                                                                                                                                                                                                                                                                                                       |           |
| 9                                      | 3.01 | Has the taxon become naturalised (established viable populations) outside its native range?                                                                      | Yes    | The taxon has established persistent populations in the Canary Islands (Triay-Portella et al., 2015; Espino et al., 2019).                                                                                                                                                                                                                                                                                                                                                                            | High      |
| 10                                     | 3.02 | In the taxon's introduced range, are there known adverse impacts to wild stocks or commercial taxa?                                                              | No     | The taxon preys on benthic invertebrates (e.g. echinoderms, crustaceans, molluscs), with the sea urchin <i>Diadema</i> being one of his main prey items at the Canary Islands (Brito & Falcon, 1990). <i>Diadema</i> is considered an important ecosystem engineer in the RA area, and its densities have a great influence on local ecosystems (Gizzi et al., 2020 & 2021). There are no reports of the taxon reaching densities in their introduced range which had an influence on wild stocks.    | Medium    |
| 11                                     | 3.03 | In the taxon's introduced range, are there known adverse impacts to aquaculture?                                                                                 | No     | There is no information available on any adverse impacts of the taxon on aquaculture in its introduced range or other locations in general.                                                                                                                                                                                                                                                                                                                                                           | High      |
| 12                                     | 3.04 | In the taxon's introduced range, are there known adverse impacts to ecosystem services?                                                                          | No     | The taxon preys on benthic invertebrates (e.g. echinoderms, crustaceans, molluscs), with the urchin <i>Diadema</i> being one of his main prey items at the Canary Islands (Brito & Falcon, 1990). <i>Diadema</i> is considered an important ecosystem engineer in the RA area, and its densities have a great influence on local ecosystems (Gizzi et al., 2020 & 2021). There are no reports of the taxon reaching densities in their introduced range which had an influence on ecosystem services. | Medium    |
| 13                                     | 3.05 | In the taxon's introduced range, are there known adverse socio-economic impacts?                                                                                 | No     | There is no information available on any adverse impacts of the taxon on socio-economy in its introduced range                                                                                                                                                                                                                                                                                                                                                                                        | Medium    |
| B. Biology/Ecology                     |      |                                                                                                                                                                  |        |                                                                                                                                                                                                                                                                                                                                                                                                                                                                                                       |           |
| 4. Undesirable (or persistence) traits |      |                                                                                                                                                                  |        |                                                                                                                                                                                                                                                                                                                                                                                                                                                                                                       |           |

|    |      |                                                                                                                                                                         |     |                                                                                                                                                                                                                                                                                                                                                                                                                                                                                                                                                                                                                      |        |
|----|------|-------------------------------------------------------------------------------------------------------------------------------------------------------------------------|-----|----------------------------------------------------------------------------------------------------------------------------------------------------------------------------------------------------------------------------------------------------------------------------------------------------------------------------------------------------------------------------------------------------------------------------------------------------------------------------------------------------------------------------------------------------------------------------------------------------------------------|--------|
| 14 | 4.01 | Is it likely that the taxon will be poisonous, or pose other risks to human health?                                                                                     | Yes | The body of the taxon is covered in robust, external spines, which can pose a risk to human health at direct contact.                                                                                                                                                                                                                                                                                                                                                                                                                                                                                                | Medium |
| 15 | 4.02 | Is it likely that the taxon will smother one or more native taxa (that are not threatened or protected)?                                                                | No  | No information available suggests that the taxon will smother native taxa.                                                                                                                                                                                                                                                                                                                                                                                                                                                                                                                                           | High   |
| 16 | 4.03 | Are there threatened or protected taxa that the non-native taxon would parasitise in the RA area?                                                                       | No  | The taxon does not parasitise other species. The taxon preys on benthic invertebrates (e.g. echinoderms, crustaceans, molluscs; Brito & Falcon, 1990). There are no reports on incidents of the taxon consuming a threatened or protected species.                                                                                                                                                                                                                                                                                                                                                                   | High   |
| 17 | 4.04 | Is the taxon adaptable in terms of climatic and other environmental conditions, thus enhancing its potential persistence if it has invaded or could invade the RA area? | No  | There is no information available on the adaptability of this taxon to climatic/environmental conditions. The taxon has a circumtropical distribution and therefore shows tolerance to a great range of conditions, but adaptability hasn't been reported or tested.                                                                                                                                                                                                                                                                                                                                                 | Low    |
| 18 | 4.05 | Is the taxon likely to disrupt food-web structure/function in aquatic ecosystems it has or is likely to invade in the RA area?                                          | No  | No information was found that suggests a disruption of the local food web structure. The taxon preys on benthic invertebrates (e.g. echinoderms, crustaceans, molluscs), with the urchin <i>Diadema</i> being one of his main prey items at the Canary Islands (Brito & Falcon, 1990). <i>Diadema</i> is considered an important ecosystem engineer in the RA area, and its densities have a great influence on local ecosystems (Gizzi et al., 2020 & 2021). There are no reports of the taxon reaching densities in their introduced range which had an influence on ecosystem services.                           | Medium |
| 19 | 4.06 | Is the taxon likely to exert adverse impacts on ecosystem services in the RA area?                                                                                      | No  | No information was found in the literature that suggests adverse impacts on ecosystem services in the RA area. The taxon preys on benthic invertebrates (e.g. echinoderms, crustaceans, molluscs), with the urchin <i>Diadema</i> being one of his main prey items at the Canary Islands (Brito & Falcon, 1990). <i>Diadema</i> is considered an important ecosystem engineer in the RA area, and its densities have a great influence on local ecosystems (Gizzi et al., 2020 & 2021). There are no reports of the taxon reaching densities in their introduced range which had an influence on ecosystem services. | Medium |
| 20 | 4.07 | Is it likely that the taxon will host, and/or act as a vector for, recognised pests and infectious agents that are endemic in the RA area?                              | No  | No information on recognized pests or infectious agents that are endemic in the RA area which could use the taxon as a host.                                                                                                                                                                                                                                                                                                                                                                                                                                                                                         | Medium |
| 21 | 4.08 | Is it likely that the taxon will host, and/or act as a vector for, recognised pests and infectious agents that are absent from (novel to) the RA area?                  | Yes | The taxon is known to carry different parasites (Nagasawa 2012; Martin et al., 2018), including species that haven't been recorded in the RA area yet (example: <i>Cymothoa pulchra</i> ; Nagasawa & Uyeno, 2012).                                                                                                                                                                                                                                                                                                                                                                                                   | High   |
| 22 | 4.09 | Is it likely that the taxon will achieve a body size that will make it more likely to be released from captivity?                                                       | Yes | The taxon is rarely used as a pet in the aquarium trade. As the taxon can reach great sizes, it requires a certain level of experience and very big aquaria. The possibility of releases due to reaching great body size and exceeding their aquarium can not be excluded but seems rather unlikely.                                                                                                                                                                                                                                                                                                                 | Low    |
| 23 | 4.10 | Is the taxon capable of sustaining itself in a range of water velocity conditions (e.g. versatile in habitat use)?                                                      | Yes | There is no information on the swimming abilities of the taxon. Juveniles are known to drift/raft under floating debris (Afonso et al., 2013). Adults are known as slow swimmers but using crevices and other habitat features as hideouts from currents.                                                                                                                                                                                                                                                                                                                                                            | Low    |

|                          |      |                                                                                                                                                                                    |      |                                                                                                                                                                                                                                                                                                                                                                                                                                               |           |
|--------------------------|------|------------------------------------------------------------------------------------------------------------------------------------------------------------------------------------|------|-----------------------------------------------------------------------------------------------------------------------------------------------------------------------------------------------------------------------------------------------------------------------------------------------------------------------------------------------------------------------------------------------------------------------------------------------|-----------|
| 24                       | 4.11 | Is it likely that the taxon's mode of existence (e.g. excretion of by-products) or behaviours (e.g. feeding) will reduce habitat quality for native taxa?                          | No   | No information available that suggests that the taxon will reduce habitat quality for native taxa.                                                                                                                                                                                                                                                                                                                                            | Medium    |
| 25                       | 4.12 | Is the taxon likely to maintain a viable population even when present in low densities (or persisting in adverse conditions by way of a dormant form)?                             | Yes  | Populations in the Canary Islands seem to be persistent over decades, although densities were low (Brito and Falcon, 1990; Espino et al., 2019).                                                                                                                                                                                                                                                                                              | High      |
| 5. Resource exploitation |      |                                                                                                                                                                                    |      |                                                                                                                                                                                                                                                                                                                                                                                                                                               |           |
| 26                       | 5.01 | Is the taxon likely to consume threatened or protected native taxa in RA area?                                                                                                     | No   | The taxon preys on benthic invertebrates (e.g. echinoderms, crustaceans, molluscs). There is no information available on incidents where the taxon consumed any threatened/protected species.                                                                                                                                                                                                                                                 | Medium    |
| 27                       | 5.02 | Is the taxon likely to sequester food resources (including nutrients) to the detriment of native taxa in the RA area?                                                              | No   | There is no information available on the sequestering of resources by the taxon.                                                                                                                                                                                                                                                                                                                                                              | Medium    |
| 6. Reproduction          |      |                                                                                                                                                                                    |      |                                                                                                                                                                                                                                                                                                                                                                                                                                               |           |
| 28                       | 6.01 | Is the taxon likely to exhibit parental care and/or to reduce age-at-maturity in response to environmental conditions?                                                             | No   | The taxon does not show parental care (Almada et al. 1999), and there is no information on age to maturity for the taxon available.                                                                                                                                                                                                                                                                                                           | High      |
| 29                       | 6.02 | Is the taxon likely to produce viable gametes or propagules (in the RA area)?                                                                                                      | Yes  | Although there is no information on spawning areas or conditions (Andrade et al., 2016), a captive specimen of the taxon spawned at 25°C and a salinity of 34-35 (Doi et al., 2015). These are conditions that are reached during summer in the RA area. Therefore reproduction seems possible in the RA area.                                                                                                                                | Medium    |
| 30                       | 6.03 | Is the taxon likely to hybridize naturally with native taxa?                                                                                                                       | No   | There are no reports on hybridisation directly in this taxon. However, the closely related species <i>C. antillarum</i> was able to successfully fertilize eggs of <i>C. schoepfii</i> , so hybridisation can not be excluded in the taxon. The only closely related species in the RA area is <i>Diodon hystrix</i> ( <i>D. eydouxii</i> ; Wirtz et al., 2008), which is very rare in the RA area. Therefore hybridisation is very unlikely. | High      |
| 31                       | 6.04 | Is the taxon likely to be hermaphroditic or to display asexual reproduction?                                                                                                       | No   | There is no record of hermaphrody in the taxon of closely related species (Kuwamura et al., 2020), and the taxon does not reproduce asexually.                                                                                                                                                                                                                                                                                                | Very high |
| 32                       | 6.05 | Is the taxon dependent on the presence of another taxon (or specific habitat features) to complete its life cycle?                                                                 | No   | The taxon is not dependent on the presence of another species, and there is no information on specific habitat features needed to complete its life cycle.                                                                                                                                                                                                                                                                                    | High      |
| 33                       | 6.06 | Is the taxon known (or likely) to produce a large number of propagules or offspring within a short time span (e.g. <1 year)?                                                       | Yes  | The taxon is reported to spawn 100.000 eggs in one event (Doi et al., 2015), but there is no information on the success/survival of the offspring or the time between spawning events in a female.                                                                                                                                                                                                                                            | Medium    |
| 34                       | 6.07 | How many time units (days, months, years) does the taxon require to reach the age-at-first-reproduction? [In the Justification field, indicate the relevant time unit being used.] | n.a. | There is no information available.                                                                                                                                                                                                                                                                                                                                                                                                            | Low       |
| 7. Dispersal mechanisms  |      |                                                                                                                                                                                    |      |                                                                                                                                                                                                                                                                                                                                                                                                                                               |           |
| 35                       | 7.01 | How many potential internal pathways could the taxon use to disperse within the RA area (with suitable habitats nearby)?                                                           | >1   | Eggs, larvae, and juveniles are pelagic and could be possibly transported by natural currents or ballast waters (Doi et al., 2015; Leis et al., 2016). Juveniles are sometimes found associated with floating algae/debris (Afonso et al., 2013).                                                                                                                                                                                             | High      |

|                         |      |                                                                                                                                                                                           |     |                                                                                                                                                                                                                                                                                                                                                                                                                                              |           |
|-------------------------|------|-------------------------------------------------------------------------------------------------------------------------------------------------------------------------------------------|-----|----------------------------------------------------------------------------------------------------------------------------------------------------------------------------------------------------------------------------------------------------------------------------------------------------------------------------------------------------------------------------------------------------------------------------------------------|-----------|
| 36                      | 7.02 | Will any of these pathways bring the taxon in close proximity to one or more protected areas (e.g. MCZ, MPA, SSSI)?                                                                       | Yes | There are several MPAs in the RA area.                                                                                                                                                                                                                                                                                                                                                                                                       | High      |
| 37                      | 7.03 | Does the taxon have a means of actively attaching itself to hard substrata (e.g. ship hulls, pilings, buoys) such that it enhances the likelihood of dispersal?                           | No  | None of the taxons' life stages is recorded to actively attach itself to a hard substrate (epipelagic eggs, larvae, and juveniles). The adult stage does not display any specialized structures to facilitate attachment.                                                                                                                                                                                                                    | Very high |
| 38                      | 7.04 | Is natural dispersal of the taxon likely to occur as eggs (for animals) or as propagules (for plants: seeds, spores) in the RA area?                                                      | Yes | Natural dispersal in this taxon occurs by epipelagic eggs, larvae, and juveniles (Doi et al., 2015; Leis et al., 2016).                                                                                                                                                                                                                                                                                                                      | High      |
| 39                      | 7.05 | Is natural dispersal of the taxon likely to occur as larvae/juveniles (for animals) or as fragments/seedlings (for plants) in the RA area?                                                | Yes | Natural dispersal in this taxon occurs by epipelagic eggs, larvae, and juveniles (Doi et al., 2015; Leis et al., 2016).                                                                                                                                                                                                                                                                                                                      | High      |
| 40                      | 7.06 | Are older life stages of the taxon likely to migrate in the RA area for reproduction?                                                                                                     | No  | There is no information available on the reproduction areas of the taxon or the necessary conditions for reproduction. Furthermore, there are no records of migration patterns of this species available. However, environmental conditions in the RA area overlap with the taxons' natural range so that reproduction might be possible in the RA area.                                                                                     | Low       |
| 41                      | 7.07 | Are propagules or eggs of the taxon likely to be dispersed in the RA area by other animals?                                                                                               | No  | There is no information available that suggests eggs or juveniles being transported by other animals.                                                                                                                                                                                                                                                                                                                                        | Medium    |
| 42                      | 7.08 | Is dispersal of the taxon along any of the pathways mentioned in the previous seven questions (7.01–7.07; i.e. both unintentional or intentional) likely to be rapid?                     | Yes | Eggs, larvae, and juveniles are pelagic and could be possibly transported by currents and ballast waters (Doi et al., 2015; Leis et al., 2016). Therefore the dispersal of the taxon has the potential to be rapid (<1year).                                                                                                                                                                                                                 | Medium    |
| 43                      | 7.09 | Is dispersal of the taxon density dependent?                                                                                                                                              | No  | There is no information available.                                                                                                                                                                                                                                                                                                                                                                                                           | Low       |
| 8. Tolerance attributes |      |                                                                                                                                                                                           |     |                                                                                                                                                                                                                                                                                                                                                                                                                                              |           |
| 44                      | 8.01 | Is the taxon able to withstand being out of water for extended periods (e.g. minimum of one or more hours) at some stage of its life cycle?                                               | No  | There is no information available. There are no indications that the taxon can withstand extended periods out of the water.                                                                                                                                                                                                                                                                                                                  | Medium    |
| 45                      | 8.02 | Is the taxon tolerant of a wide range of water quality conditions relevant to that taxon? [In the Justification field, indicate the relevant water quality variable(s) being considered.] | No  | There is no information available.                                                                                                                                                                                                                                                                                                                                                                                                           | Medium    |
| 46                      | 8.03 | Can the taxon be controlled or eradicated in the wild with chemical, biological, or other agents/means?                                                                                   | No  | There is no information available for the taxon. However, given the fact that the taxon is a motile fish, local eradication based on chemical/biological agents is most likely difficult due to its spread throughout the RA area. Targeted removal could be used to decrease numbers, but a full eradication or control is questionable (Giakoumi et al., 2019).                                                                            | Medium    |
| 47                      | 8.04 | Is the taxon likely to tolerate or benefit from environmental/human disturbance?                                                                                                          | No  | There is no information available.                                                                                                                                                                                                                                                                                                                                                                                                           | Low       |
| 48                      | 8.05 | Is the taxon able to tolerate salinity levels that are higher or lower than those found in its usual environment?                                                                         | No  | Although the taxon is considered euryhaline in Andrade et al., 2016, there seems to be no information available to support this evaluation. The predicted optimal salinity ranges (by Aquamaps) cover 30.5-36 and minimum-maximum of 22.5 - 39, respectively, placing the species mostly in the marine spectrum. There is no information available on experimental studies performed on this taxon to test its tolerance regarding salinity. | High      |

|                          |      |                                                                                                                                                              |           |                                                                                                                                                                                                                                                                                                                                                                                                                                                                                                                                                                                                                                       |        |
|--------------------------|------|--------------------------------------------------------------------------------------------------------------------------------------------------------------|-----------|---------------------------------------------------------------------------------------------------------------------------------------------------------------------------------------------------------------------------------------------------------------------------------------------------------------------------------------------------------------------------------------------------------------------------------------------------------------------------------------------------------------------------------------------------------------------------------------------------------------------------------------|--------|
| 49                       | 8.06 | Are there effective natural enemies (predators) of the taxon present in the RA area?                                                                         | Yes       | There is no information on predators on the taxon itself available. However, studies on other porcupine fish species list several predators on eggs/larvae/juveniles as well as adults, including tuna, groupers, dolphins, and a variety of shark species (Shepherd et al., 2019). All these groups of potential predators exist in the RA area.                                                                                                                                                                                                                                                                                     | High   |
| <b>C. Climate change</b> |      |                                                                                                                                                              |           |                                                                                                                                                                                                                                                                                                                                                                                                                                                                                                                                                                                                                                       |        |
| 9. Climate change        |      |                                                                                                                                                              |           |                                                                                                                                                                                                                                                                                                                                                                                                                                                                                                                                                                                                                                       |        |
| 50                       | 9.01 | Under the predicted future climatic conditions, are the risks of entry into the RA area posed by the taxon likely to increase, decrease or not change?       | No change | The risk of the taxon entering the RA area is likely to stay similar to the current situation. Dispersal of the taxon is most likely during the early life stages (eggs, larvae, juveniles), which depends on currents/rafting or human-mediated transport (e.g. ballast waters). There is no information available that suggests major changes of these factors due to climate change.                                                                                                                                                                                                                                               | Medium |
| 51                       | 9.02 | Under the predicted future climatic conditions, are the risks of establishment posed by the taxon likely to increase, decrease or not change?                | Increase  | The optimal temperature of the taxon is higher than current seawater temperatures in the RA area. Therefore the predicted increases of SST in the RA area will make the area more suitable for the taxon.                                                                                                                                                                                                                                                                                                                                                                                                                             | High   |
| 52                       | 9.03 | Under the predicted future climatic conditions, are the risks of dispersal within the RA area posed by the taxon likely to increase, decrease or not change? | No change | The dispersal of the taxon in the RA area is likely to stay similar to the current situation. Dispersal of the taxon is most likely during the early life stages (eggs, larvae, juveniles), which depends on currents/rafting or human-mediated transport (e.g. ballast waters). There is no information available that suggests major changes of these factors due to climate change.                                                                                                                                                                                                                                                | Medium |
| 53                       | 9.04 | Under the predicted future climatic conditions, what is the likely magnitude of future potential impacts on biodiversity and/or ecological integrity/status? | No change | Under predicted future conditions the establishment and spread of the taxon in the RA area could increase considering the tropical affinity of the taxon. The increase of the taxon could lead to an increased predation on the sea urchin <i>Diadema</i> , a keystone species in the area. Decreases in <i>Diadema</i> can lead to a phase shift from barren to algae dominated habitats (Gizzi et al., 2020 & 2021). However, the impact of future conditions on <i>Diadema</i> as well as macro-algae dominated habitats haven't been studied, making predictions on future biodiversity and ecological status highly speculative. | Low    |
| 54                       | 9.05 | Under the predicted future climatic conditions, what is the likely magnitude of future potential impacts on ecosystem structure and/or function?             | No change | Under predicted future conditions, the establishment and spread of the taxon in the RA area could increase considering the tropical affinity of the taxon. The increase of the taxon could lead to increased predation on the sea urchin <i>Diadema</i> , a keystone species in the area. Decreases in <i>Diadema</i> can lead to a phase shift from barren to algae-dominated habitats (Gizzi et al., 2020 & 2021). However, the impact of future conditions on <i>Diadema</i> as well as macro-algae dominated habitats haven't been studied, making predictions on ecosystem structure/function highly speculative.                | Low    |
| 55                       | 9.06 | Under the predicted future climatic conditions, what is the likely magnitude of future potential impacts on ecosystem services/socio-economic factors?       | No change | Under predicted future conditions, the establishment and spread of the taxon in the RA area could increase considering the tropical affinity of the taxon. The increase of the taxon could lead to increased predation on the sea urchin <i>Diadema</i> , a keystone species in the area. Decreases in <i>Diadema</i> can lead to a phase shift from barren to algae-dominated habitats (Gizzi et al., 2020 & 2021). However, the impact of future conditions on <i>Diadema</i>                                                                                                                                                       | Low    |

as well as macro-algae-dominated habitats hasn't been studied, making predictions on ecosystem services and socio-economy highly speculative.

| Statistics                                     |        |
|------------------------------------------------|--------|
| Scores                                         |        |
| BRA Score                                      | 4.5    |
| BRA Outcome                                    | Medium |
| BRA+CCA Score                                  | 6.5    |
| BRA+CCA Outcome                                | Medium |
| Score partition                                |        |
| A. Biogeography/Historical                     | 1,5    |
| 1. Domestication/Cultivation                   | -2     |
| 2. Climate, distribution and introduction risk | 2      |
| 3. Invasive elsewhere                          | 1,5    |
| B. Biology/Ecology                             | 3      |
| 4. Undesirable (or persistence) traits         | 4      |
| 5. Resource exploitation                       | 0      |
| 6. Reproduction                                | 1      |
| 7. Dispersal mechanisms                        | 2      |
| 8. Tolerance attributes                        | -4     |
| C. Climate change                              | 2      |
| 9. Climate change                              | 2      |
| Answered Questions                             |        |
| Total                                          | 55     |
| A. Biogeography/Historical                     | 13     |
| 1. Domestication/Cultivation                   | 3      |
| 2. Climate, distribution and introduction risk | 5      |

| Thresholds |      |
|------------|------|
| BRA        | 12.5 |
| BRA+CCA    | 23.4 |
| Confidence |      |
| BRA+CCA    | 0.59 |
| BRA        | 0.61 |
| CCA        | 0.42 |

| Date and Time       |
|---------------------|
| 22.07.2021 17:57:48 |

|                                              |           |
|----------------------------------------------|-----------|
| 3. Invasive elsewhere                        | 5         |
| <b>B. Biology/Ecology</b>                    | <b>36</b> |
| 4. Undesirable (or persistence) traits       | 12        |
| 5. Resource exploitation                     | 2         |
| 6. Reproduction                              | 7         |
| 7. Dispersal mechanisms                      | 9         |
| 8. Tolerance attributes                      | 6         |
| <b>C. Climate change</b>                     | <b>6</b>  |
| 9. Climate change                            | 6         |
| <b>Sectors affected</b>                      |           |
| <b>Commercial</b>                            | <b>3</b>  |
| <b>Environmental</b>                         | <b>1</b>  |
| <b>Species or population nuisance traits</b> | <b>8</b>  |

## Assessment #5

| Taxon and Assessor details         |                                                                                                                                                                                                                                            |
|------------------------------------|--------------------------------------------------------------------------------------------------------------------------------------------------------------------------------------------------------------------------------------------|
| Category                           | Fishes and Lampreys (marine)                                                                                                                                                                                                               |
| Taxon name                         | Chilomycterus reticulatus                                                                                                                                                                                                                  |
| Common name                        | Spotfin burrfish                                                                                                                                                                                                                           |
| Assessor                           | Sahar Chebaane                                                                                                                                                                                                                             |
| Risk screening context             |                                                                                                                                                                                                                                            |
| Reason and socio-economic benefits | The Spotfin burrfish has a circumglobal distribution in tropical, subtropical and warm temperate areas of the Pacific, Indian and Atlantic Oceans. It has been sighted in the Mediterranean, Azores and Madeira                            |
| Risk assessment area               | Madeira                                                                                                                                                                                                                                    |
| Taxonomy                           | Animalia (Kingdom) Chordata (Phylum) Vertebrata (Subphylum) Gnathostomata (Superclass) Pisces (Superclass) Actinopterygii (Class) Tetraodontiformes (Order) Diodontidae (Family) Chilomycterus (Genus) Chilomycterus reticulatus (Species) |
| Native range                       | Gulf of Mexico, Atlantic, Indian and Pacific Oceans                                                                                                                                                                                        |
| Introduced range                   | Mediterranean Sea and maybe Azores and Madeira                                                                                                                                                                                             |
| URL                                |                                                                                                                                                                                                                                            |

| Response Justification (references and/or other information) Confidence |      |                                                                                               |        |                                                                                                                                                                              |           |
|-------------------------------------------------------------------------|------|-----------------------------------------------------------------------------------------------|--------|------------------------------------------------------------------------------------------------------------------------------------------------------------------------------|-----------|
| A. Biogeography/Historical                                              |      |                                                                                               |        |                                                                                                                                                                              |           |
| 1. Domestication/Cultivation                                            |      |                                                                                               |        |                                                                                                                                                                              |           |
| 1                                                                       | 1.01 | Has the taxon been the subject of domestication (or cultivation) for at least 20 generations? | No     | The biology and ecology of this fish is not yet well known (Leis et al., 2015)                                                                                               | High      |
| 2                                                                       | 1.02 | Is the taxon harvested in the wild and likely to be sold or used in its live form?            | Yes    | In African countries it is often captured, dried and sold as ornaments                                                                                                       | Medium    |
| 3                                                                       | 1.03 | Does the taxon have invasive races, varieties, sub-taxa or congeners?                         | No     | Cylichthys spilostylus was reported in the mediterranean sea but without showing an invasive behaviour (Saad et al., 2018) also in the Canary Islands (Espino et al., 2019). | Medium    |
| 2. Climate, distribution and introduction risk                          |      |                                                                                               |        |                                                                                                                                                                              |           |
| 4                                                                       | 2.01 | How similar are the climatic conditions of the RA area and the taxon's native range?          | Medium | Climatch score ranges between 3 and 8 when compared to the Canary Islands.                                                                                                   | High      |
| 5                                                                       | 2.02 | What is the quality of the climate matching data?                                             | Medium | There are not a lot of stations in climatch are limited and with wide range of scores                                                                                        | Medium    |
| 6                                                                       | 2.03 | Is the taxon already present outside of captivity in the RA area?                             | Yes    | There are multiple records of Chilomycterus reticulatus in Madeira.                                                                                                          | Very high |

|                                        |      |                                                                                                                                                                         |      |                                                                                                                                                                                                                                                                     |           |
|----------------------------------------|------|-------------------------------------------------------------------------------------------------------------------------------------------------------------------------|------|---------------------------------------------------------------------------------------------------------------------------------------------------------------------------------------------------------------------------------------------------------------------|-----------|
| 7                                      | 2.04 | How many potential pathways could the taxon use to enter in the RA area?                                                                                                | >1   | It may have arrived through maritime traffic, including oil rigs and drilling vessels (Triay-Portella et al., 2015; Pajuelo et al., 2016).                                                                                                                          | Medium    |
| 8                                      | 2.05 | Is the taxon currently found in close proximity to, and likely to enter into, the RA area in the near future (e.g. unintentional and intentional introductions)?        | Yes  | Chilomycterus reticulatus is present in the Canary islands (Espino et al., 2019)                                                                                                                                                                                    | High      |
| 3. Invasive elsewhere                  |      |                                                                                                                                                                         |      |                                                                                                                                                                                                                                                                     |           |
| 9                                      | 3.01 | Has the taxon become naturalised (established viable populations) outside its native range?                                                                             | Yes  | Chilomycterus reticulatus became naturalised outside its native range, e.g. in the Island of el Hierro (Canary Islands) the species established viable populations and it is really common since at least the late 1980s (Brito et al., 2002; Potter et al., 1988). | Medium    |
| 10                                     | 3.02 | In the taxon's introduced range, are there known adverse impacts to wild stocks or commercial taxa?                                                                     | No   | No information is available on the impact of this species on wild stock or commercial taxa in its introduced range.                                                                                                                                                 | Low       |
| 11                                     | 3.03 | In the taxon's introduced range, are there known adverse impacts to aquaculture?                                                                                        | No   | No information is available on impact of this species on aquaculture stocks in its introduced range                                                                                                                                                                 | Low       |
| 12                                     | 3.04 | In the taxon's introduced range, are there known adverse impacts to ecosystem services?                                                                                 | No   | No information is available on the adverse impact of C. reticulatus to ecosystem services in its introduced range.                                                                                                                                                  | Medium    |
| 13                                     | 3.05 | In the taxon's introduced range, are there known adverse socio-economic impacts?                                                                                        | No   | No information is available on adverse socio-economic impacts by C. reticulatus in its introduced range.                                                                                                                                                            | Medium    |
| B. Biology/Ecology                     |      |                                                                                                                                                                         |      |                                                                                                                                                                                                                                                                     |           |
| 4. Undesirable (or persistence) traits |      |                                                                                                                                                                         |      |                                                                                                                                                                                                                                                                     |           |
| 14                                     | 4.01 | Is it likely that the taxon will be poisonous, or pose other risks to human health?                                                                                     | No   | It's not a venomous species but it has an inflatable body covered by numerous spines that may, theoretically, cause injury to humans.                                                                                                                               | Low       |
| 15                                     | 4.02 | Is it likely that the taxon will smother one or more native taxa (that are not threatened or protected)?                                                                | n.a. | Taxon is not a plant, algae or other sessile organism that can overgrow and smother native taxa                                                                                                                                                                     | Very high |
| 16                                     | 4.03 | Are there threatened or protected taxa that the non-native taxon would parasitise in the RA area?                                                                       | No   | No interaction between the taxon and any threatened or protected taxa                                                                                                                                                                                               | High      |
| 17                                     | 4.04 | Is the taxon adaptable in terms of climatic and other environmental conditions, thus enhancing its potential persistence if it has invaded or could invade the RA area? | No   | There is no other evidence that the taxa can adapt to new conditions                                                                                                                                                                                                | Low       |
| 18                                     | 4.05 | Is the taxon likely to disrupt food-web structure/function in aquatic ecosystems it has or is likely to invade in the RA area?                                          | No   | No information is available on the negative impact of C. reticulatus on food-web structure and/or function.                                                                                                                                                         | Low       |
| 19                                     | 4.06 | Is the taxon likely to exert adverse impacts on ecosystem services in the RA area?                                                                                      | No   | There is no evidence to support that C. reticulatus could promote adverse impacts on ecosystem services in Madeira.                                                                                                                                                 | Medium    |
| 20                                     | 4.07 | Is it likely that the taxon will host, and/or act as a vector for, recognised pests and infectious agents that are endemic in the RA area?                              | Yes  | the taxa could serve as vector to ciguatera                                                                                                                                                                                                                         | Low       |

|                          |      |                                                                                                                                                                                    |      |                                                                                                                                                                                          |        |
|--------------------------|------|------------------------------------------------------------------------------------------------------------------------------------------------------------------------------------|------|------------------------------------------------------------------------------------------------------------------------------------------------------------------------------------------|--------|
| 21                       | 4.08 | Is it likely that the taxon will host, and/or act as a vector for, recognised pests and infectious agents that are absent from (novel to) the RA area?                             | Yes  | This fish is reported as a hoster of a bocal parasite ( <i>Cymothoa pulchrum</i> Lanchester, 1902). This parasite (isopod) is not yet registered in the RA area (Nagasawa and Doi 2012). | Medium |
| 22                       | 4.09 | Is it likely that the taxon will achieve a body size that will make it more likely to be released from captivity?                                                                  | No   | <i>Chilomycterus reticulatus</i> is not generally subject to home aquarium captivity                                                                                                     | Low    |
| 23                       | 4.10 | Is the taxon capable of sustaining itself in a range of water velocity conditions (e.g. versatile in habitat use)?                                                                 | No   | There is no evidence that they can persist in flowing waters with 0.7 m per second velocities.                                                                                           | Low    |
| 24                       | 4.11 | Is it likely that the taxon's mode of existence (e.g. excretion of by-products) or behaviours (e.g. feeding) will reduce habitat quality for native taxa?                          | No   | No information is available on habitat quality reduction by <i>C. reticulatus</i> for native taxa.                                                                                       | Medium |
| 25                       | 4.12 | Is the taxon likely to maintain a viable population even when present in low densities (or persisting in adverse conditions by way of a dormant form)?                             | Yes  | In Canary Islands (Espino et al. 2019)                                                                                                                                                   | High   |
| 5. Resource exploitation |      |                                                                                                                                                                                    |      |                                                                                                                                                                                          |        |
| 26                       | 5.01 | Is the taxon likely to consume threatened or protected native taxa in RA area?                                                                                                     | No   | The taxon doesn't consume any threatened or protected native taxa.                                                                                                                       | Medium |
| 27                       | 5.02 | Is the taxon likely to sequester food resources (including nutrients) to the detriment of native taxa in the RA area?                                                              | No   | There is no evidence that the taxa can consume prey at the expense of native species                                                                                                     | Medium |
| 6. Reproduction          |      |                                                                                                                                                                                    |      |                                                                                                                                                                                          |        |
| 28                       | 6.01 | Is the taxon likely to exhibit parental care and/or to reduce age-at-maturity in response to environmental conditions?                                                             | No   | <i>Chilomycterus reticulatus</i> doesn't exhibit parental care (Leis, J. 1978)                                                                                                           | High   |
| 29                       | 6.02 | Is the taxon likely to produce viable gametes or propagules (in the RA area)?                                                                                                      | Yes  | Madeira has a subtropical climate that matches conditions within the range in which the taxa is established (e.g. canary islands)                                                        | Medium |
| 30                       | 6.03 | Is the taxon likely to hybridize naturally with native taxa?                                                                                                                       | No   | no research papers about a natural hybridization with a native taxa                                                                                                                      | High   |
| 31                       | 6.04 | Is the taxon likely to be hermaphroditic or to display asexual reproduction?                                                                                                       | No   | No information is available on asexual reproduction or hermafroditism of <i>C. reticulatus</i> .                                                                                         | Medium |
| 32                       | 6.05 | Is the taxon dependent on the presence of another taxon (or specific habitat features) to complete its life cycle?                                                                 | No   | No information is available on the needed of other taxon to complete her life cycle                                                                                                      | Medium |
| 33                       | 6.06 | Is the taxon known (or likely) to produce a large number of propagules or offspring within a short time span (e.g. <1 year)?                                                       | No   | No information is available on the reproduction of <i>C. reticulatus</i> .                                                                                                               | Low    |
| 34                       | 6.07 | How many time units (days, months, years) does the taxon require to reach the age-at-first-reproduction? [In the Justification field, indicate the relevant time unit being used.] | n.a. | There is no information on the age at first reproduction of <i>C. reticulatus</i> .                                                                                                      | High   |
| 7. Dispersal mechanisms  |      |                                                                                                                                                                                    |      |                                                                                                                                                                                          |        |
| 35                       | 7.01 | How many potential internal pathways could the taxon use to disperse within the RA area (with suitable habitats nearby)?                                                           | >1   | <i>Chilomycterus reticulatus</i> could disperse whitin of Madeira area through ballast and rafting on floating                                                                           | High   |

|                         |      |                                                                                                                                                                                           |          |                                                                                                                                                                                    |           |
|-------------------------|------|-------------------------------------------------------------------------------------------------------------------------------------------------------------------------------------------|----------|------------------------------------------------------------------------------------------------------------------------------------------------------------------------------------|-----------|
| 36                      | 7.02 | Will any of these pathways bring the taxon in close proximity to one or more protected areas (e.g. MCZ, MPA, SSSI)?                                                                       | Yes      | In Madeira there are some MPAs, and a couple of them (Cabo Girão and Garajau) are close to Funchal, the capital of the Island, characterized by the highest shipping traffic.      | High      |
| 37                      | 7.03 | Does the taxon have a means of actively attaching itself to hard substrata (e.g. ship hulls, pilings, buoys) such that it enhances the likelihood of dispersal?                           | No       | No information is available on it.                                                                                                                                                 | High      |
| 38                      | 7.04 | Is natural dispersal of the taxon likely to occur as eggs (for animals) or as propagules (for plants: seeds, spores) in the RA area?                                                      | Yes      | The eggs are taken by water currents (Sommer et al. 1996).                                                                                                                         | High      |
| 39                      | 7.05 | Is natural dispersal of the taxon likely to occur as larvae/juveniles (for animals) or as fragments/seedlings (for plants) in the RA area?                                                | Yes      | the larvae are taken by the water currents and juveniles could be associated to floating                                                                                           | High      |
| 40                      | 7.06 | Are older life stages of the taxon likely to migrate in the RA area for reproduction?                                                                                                     | No       | No migratory behaviour                                                                                                                                                             | Low       |
| 41                      | 7.07 | Are propagules or eggs of the taxon likely to be dispersed in the RA area by other animals?                                                                                               | No       | No information is available, but the larvae of <i>C. reticulatus</i> are pelagic, so probably the dispersal does not involve other animals.                                        | Medium    |
| 42                      | 7.08 | Is dispersal of the taxon along any of the pathways mentioned in the previous seven questions (7.01–7.07; i.e. both unintentional or intentional) likely to be rapid?                     | Yes      | Can arrive to Madeira through ballast water, this vector can be considered rapid (< 1 year).                                                                                       | Low       |
| 43                      | 7.09 | Is dispersal of the taxon density dependent?                                                                                                                                              | No       | No information is available on that.                                                                                                                                               | Low       |
| 8. Tolerance attributes |      |                                                                                                                                                                                           |          |                                                                                                                                                                                    |           |
| 44                      | 8.01 | Is the taxon able to withstand being out of water for extended periods (e.g. minimum of one or more hours) at some stage of its life cycle?                                               | No       | the taxon can't survive outside the water at any stage of it's life cycle                                                                                                          | Very high |
| 45                      | 8.02 | Is the taxon tolerant of a wide range of water quality conditions relevant to that taxon? [In the Justification field, indicate the relevant water quality variable(s) being considered.] | No       | no evidence suggest that taxon to be particularly tolerant                                                                                                                         | Low       |
| 46                      | 8.03 | Can the taxon be controlled or eradicated in the wild with chemical, biological, or other agents/means?                                                                                   | Yes      | spearfishing (like the Lionfish) Harris et al ., 2019                                                                                                                              | Low       |
| 47                      | 8.04 | Is the taxon likely to tolerate or benefit from environmental/human disturbance?                                                                                                          | No       | There is no evidence                                                                                                                                                               | Low       |
| 48                      | 8.05 | Is the taxon able to tolerate salinity levels that are higher or lower than those found in its usual environment?                                                                         | Yes      | No documentation for the minimum salinity; but it was classified as Euryhaline marine species In De Andrade et al., 2016                                                           | Low       |
| 49                      | 8.06 | Are there effective natural enemies (predators) of the taxon present in the RA area?                                                                                                      | No       | No predators or natural enemies of <i>C. reticulatus</i> seem to be present in Madeira.                                                                                            | Low       |
| C. Climate change       |      |                                                                                                                                                                                           |          |                                                                                                                                                                                    |           |
| 9. Climate change       |      |                                                                                                                                                                                           |          |                                                                                                                                                                                    |           |
| 50                      | 9.01 | Under the predicted future climatic conditions, are the risks of entry into the RA area posed by the taxon likely to increase, decrease or not change?                                    | Increase | In recent decades, several marine organisms expanded their distribution ranges due to ocean warming, as happened for <i>C. reticulatus</i> in Canary Islands (Espino et al. 2019). | High      |

|    |      |                                                                                                                                                              |          |                                                                                                                                                                                                                                                                                                                         |        |
|----|------|--------------------------------------------------------------------------------------------------------------------------------------------------------------|----------|-------------------------------------------------------------------------------------------------------------------------------------------------------------------------------------------------------------------------------------------------------------------------------------------------------------------------|--------|
|    |      |                                                                                                                                                              |          | Range expansion facilitated by climate change and warming conditions is likely to increase risks for the RA                                                                                                                                                                                                             |        |
| 51 | 9.02 | Under the predicted future climatic conditions, are the risks of establishment posed by the taxon likely to increase, decrease or not change?                | Increase | The case of Canary island (Espino et al. 2019). Range expansion facilitated by climate change and warming conditions is likely to increase risks for the establishment of this specie in the RA                                                                                                                         | High   |
| 52 | 9.03 | Under the predicted future climatic conditions, are the risks of dispersal within the RA area posed by the taxon likely to increase, decrease or not change? | Increase | In Gran Canaria (Canary Islands) the increase in the presence of <i>C. reticulatus</i> (Espino et al. 2019) facilitated by climate change and warming conditions is likely to increase risks for the RA                                                                                                                 | High   |
| 53 | 9.04 | Under the predicted future climatic conditions, what is the likely magnitude of future potential impacts on biodiversity and/or ecological integrity/status? | Higher   | With the ongoing modification related to the climatic change, this taxon could act as a host of parasites that could alter the fish stock in the RA. It could also prey on sea urchins, which are a key herbivorous species in the RA. As a result, the status of this taxon could upgrade to invasive or pest species. | Medium |
| 54 | 9.05 | Under the predicted future climatic conditions, what is the likely magnitude of future potential impacts on ecosystem structure and/or function?             | Higher   | With the ongoing modification related to the climatic change, this species may become more abundant and can affect a key herbivorous species, the sea urchins, in Madeira by consuming it                                                                                                                               | Medium |
| 55 | 9.06 | Under the predicted future climatic conditions, what is the likely magnitude of future potential impacts on ecosystem services/socio-economic factors?       | Higher   | This taxon could act as a host of parasites that could alter the fish stock in the RA. It could also prey on sea urchins, which are a key herbivorous species in the RA.                                                                                                                                                | Low    |

| Statistics                                     |        |
|------------------------------------------------|--------|
| Scores                                         |        |
| BRA Score                                      | 6.5    |
| BRA Outcome                                    | Medium |
| BRA+CCA Score                                  | 18.5   |
| BRA+CCA Outcome                                | Medium |
| Score partition                                |        |
| A. Biogeography/Historical                     | 3,5    |
| 1. Domestication/Cultivation                   | 0      |
| 2. Climate, distribution and introduction risk | 2      |
| 3. Invasive elsewhere                          | 1,5    |
| B. Biology/Ecology                             | 3      |

| Thresholds |      |
|------------|------|
| BRA        | 12.5 |
| BRA+CCA    | 23.4 |
| Confidence |      |
| BRA+CCA    | 0.52 |
| BRA        | 0.51 |
| CCA        | 0.58 |

| Date and Time       |
|---------------------|
| 03.08.2021 11:21:48 |

|                                                |           |
|------------------------------------------------|-----------|
| 4. Undesirable (or persistence) traits         | 2         |
| 5. Resource exploitation                       | 0         |
| 6. Reproduction                                | 0         |
| 7. Dispersal mechanisms                        | 2         |
| 8. Tolerance attributes                        | -1        |
| <b>C. Climate change</b>                       | <b>12</b> |
| 9. Climate change                              | 12        |
| <b>Answered Questions</b>                      |           |
| <b>Total</b>                                   | <b>55</b> |
| <b>A. Biogeography/Historical</b>              | <b>13</b> |
| 1. Domestication/Cultivation                   | 3         |
| 2. Climate, distribution and introduction risk | 5         |
| 3. Invasive elsewhere                          | 5         |
| <b>B. Biology/Ecology</b>                      | <b>36</b> |
| 4. Undesirable (or persistence) traits         | 12        |
| 5. Resource exploitation                       | 2         |
| 6. Reproduction                                | 7         |
| 7. Dispersal mechanisms                        | 9         |
| 8. Tolerance attributes                        | 6         |
| <b>C. Climate change</b>                       | <b>6</b>  |
| 9. Climate change                              | 6         |
| <b>Sectors affected</b>                        |           |
| <b>Commercial</b>                              | <b>7</b>  |
| <b>Environmental</b>                           | <b>5</b>  |
| <b>Species or population nuisance traits</b>   | <b>12</b> |

## References mentioned in the assessments

- Afonso, P.; Porteiro, F.M.; Fontes, J.; Tempera, F.; Morato, T.; Cardigos, F.; Santos, R.S. New and rare coastal fishes in the Azores islands: occasional events or tropicalization process? *J. Fish Biol.* **2013**, 83, 272–294. <https://doi.org/10.1111/jfb.12162>
- Almada, V.C.; Henriques, M.; Gonçalves, E. J. Ecology and behaviour of reef fishes in the temperate north-eastern Atlantic and adjacent waters. *Behaviour and Conservation of Littoral Fishes.* **1999**, 33-69.
- Alves, F.; Alves, C. Two new records of seabreams (Pisces: Sparidae) from the Madeira Archipelago. *Arquipélago - Life and Marine Sciences.* **2002**, 19 A: 107–11.
- Andrade, A.C. de; Santos, S.R.; Verani, J.R.; Vianna, M. Guild composition and habitat use by Tetraodontiformes (Teleostei, Acanthopterygii) in a south-western Atlantic tropical estuary. *Journal of the Marine Biological Association of the United Kingdom.* **2016**, 96(6), 1251–1264. <https://doi.org/10.1017/S0025315415001368>
- Blake, R.W. Fish functional design and swimming performance. *Journal of Fish Biology.* **2004**, 65(5), 1193-1222.
- Brito, A.; Pascual, P.J.; Falcón, J.M.; Sancho, A.; González, G. *Peces de Las Islas Canarias*. Catálogo Comentado e Ilustrado; Lemus, F., Ed.; Editorial Lemus: La Laguna, Spain, **2002**; p. 419.
- Brito, A.; Falcón, J.M. Contribution to the knowledge of the distribution and ecology of *Chilomycterus atringa* (Pisces, Diodontidae) in the Canary Islands. *Vieraea.* **1990**, 19, 271–275.
- Doi, H.; Zenke, Y.; Takahashi, H.; Sakai, H.; Ishibashi, T. Hybridization of burrfish between *Chilomycterus antillarum* and *Chilomycterus schoepfii* in captivity revealed by AFLP and mtDNA sequence analyses. *Ichthyological Research.* **2015**, 62(4), 516.
- Doi, H.; Sonoyama, T.; Yamanouchi, Y.; Tamai, K.; Sakai, H.; Ishibashi, T. Adhesive demersal eggs spawned by two southern Australian porcupine puffers. *Aquaculture Science.* **2015**, 63(3), 357–359.
- Doi, H.; Ishibashi, T.; Sakai, H. Spawning and rearing of a porcupine puffer *Cyclichthys orbicularis* (Diodontidae , Tetraodontiformes) in captivity. *Aquaculture Science.* **2015**, 63(2), 207–212.
- De Andrade, A.; Santos, S.; Verani, J.; Vianna, M. Guild composition and habitat use by Tetraodontiformes (Teleostei, Acanthopterygii) in a south-western Atlantic tropical estuary. *Journal of the Marine Biological Association of the United Kingdom*, **2016**, 96(6), 1251-1264. [doi:10.1017/S0025315415001368](https://doi.org/10.1017/S0025315415001368)

- Espino, F.; Tuya, F.; Rosario, A.; Bosch, N.E.; Coca, J.; González-Ramos, A.J.; del Rosario, F.; Otero-Ferrer, F.J.; Moreno, Á.C.; Haroun, R. Geographical Range Extension of the Spotfin burrfish, *Chilomycterus reticulatus* (L. 1758), in the Canary Islands: A Response to Ocean Warming? *Diversity*, **2019**, 11(12), 230. <https://doi.org/10.3390/d11120230>
- Espino, F.; Tuya, F.; Brito Hernández, A.M. Occurrence of the African Sergeant, *Abudefduf hoefleri* (Steindachner, 1881)(Actinopterygii: Pomacentridae) in the Canary Islands Waters. *Revista de la Academia Canaria de Ciencias*, **2015**, 27, 83-89.
- Follesa, M.C.; Mulas, A.; Porcu, C.; Cau, A. First record of *Chilomycterus reticulatus* (Osteichthyes: Diodontidae) in the Mediterranean Sea. *Journal of Fish Biology*. **2009**, 74, 1677–1681. <https://doi.org/10.1111/j.1095-8649.2009.02229.x>
- Giakoumi, S.; Katsanevakis, S.; Albano, P.G.; Azzurro, E.; Cardoso, A.C.; Cebrian, E.; Deidun, A.; Edelist, D.; Francour, P.; Jimenez, C.; Macic, V.; Occhipinti-Ambrogi, A.; Rilov, G.; Sghaier, Y.R. Management priorities for marine invasive species. *Science of the Total Environment*, **2019**, 688, 976–982. <https://doi.org/10.1016/j.scitotenv.2019.06.282>
- Gizzi, F.; Jiménez, J.; Schäfer, S.; Castro, N.; Costa, S.; Lourenço, S.; José, R.; Canning-Clode, J.; Monteiro, J. Before and after a disease outbreak: Tracking a keystone species recovery from a mass mortality event. *Mar. Environ. Res.* **2020**, 156, 1–8. <https://doi.org/10.1016/j.marenvres.2020.104905>
- Gizzi, F.; Monteiro, J.G.; Silva, R.; Schäfer, S.; Castro, N.; Almeida, S.; ...; Canning-Clode, J. Disease outbreak in a keystone grazer population brings hope to the recovery of macroalgal forests in a barren dominated island. *Frontiers in Marine Science*, **2021**, 8, 682.
- González-Acosta, A.F.; Balart, E.F.; Ruiz-Campos, G.; Espinosa-Pérez, H.; Cruz-Escalona, V.H.; Hernández-López, A. Diversity and conservation of fishes from La Paz Bay, Baja California Sur, Mexico. *Revista Mexicana de Biodiversidad*, **2018**, 89, 705–740.
- Harris, H.E.; Patterson III, W.F.; Ahrens, R.N.; Allen, M.S. Detection and removal efficiency of invasive lionfish in the northern Gulf of Mexico. *Fisheries Research*. **2019**, 213, 22-32.
- Kaschner, K.; Kesner-Reyes, K.; Garilao, C.; Segschneider, J.; Rius-Barile, J.; Rees, T.; Froese, R. Aquamaps. **2019**, Available online: [www.aquamaps.org](http://www.aquamaps.org). (accessed on 10/06/2021).
- Kuiter, R.H.; Tono-zuka, T. Pictorial guide to Indonesian reef fishes. *Zoonetics*, **2001**
- Kuwamura, T.; Sunobe, T.; Sakai, Y.; Kadota, T.; Sawada, K. Hermaphroditism in fishes: an annotated list of species, phylogeny, and mating system. *Ichthyological Research*, **2020**, 67, 341–360. <https://doi.org/10.1007/s10228-020-00754-6>

- Leis, J.M. Systematics and zoogeography of the porcupinefishes (Diodon, Diodontidae, Tetraodontiformes), with comments on egg and larval development. *Fish. Bull.* **1978**, 76(3), 535-567.
- Leis, J.L.; Matsuura, K.; Shao, K.-T.; Hardy, G.; Zapfe, G.; Liu, M.; Jing, L.; Robertson, R.; Tyler, J. *Chilomycterus reticulatus* (errata version published in 2017). In *The IUCN Red List of Threatened Species*. **2015** (accessed on 20 August 2021).
- Luiz, O. J.; Madin, J.S.; Robertson, D.R.; Rocha, L.A.; Wirtz, P.; Floeter, S.R. Ecological traits influencing range expansion across large oceanic dispersal barriers: insights from tropical Atlantic reef fishes. *Proceedings of the Royal Society B: Biological Sciences*, **2012**, 279(1730), 1033-1040.
- Luiz, O.J.; Allen, A.P.; Robertson, D.R.; Floeter, S.R.; Madin, J.S. Seafarers or castaways: ecological traits associated with rafting dispersal in tropical reef fishes. *Journal of Biogeography*, **2015**, 42(12), 2323-2333.
- Martin, S.B.; Ribu, D.; Cutmore, S.C.; Cribb, T.H. Opistholobelines (Digenea: Opecoelidae) in Australian tetraodontiform fishes. *Syst. Parasitol.* **2018**, 95(8), 743–781. <https://doi.org/10.1007/s11230-018-9826-9>
- Nagasawa, K.; Uyeno, D. Geographical distribution affected by the Kuroshio of the fish parasite *Cymothoa pulchra* (Isopoda: Cymothoidae) in Japanese waters. *Biogeography*, **2012**, 14, 151–153. <https://doi.org/10.11358/biogeo.14.151>
- Nagasawa, K.; Doi, H. The spotfin burrfish (*chilomycterus reticulatus*), a new host record for *cymothoa pulchra* (isopoda, cymothoidae). *Crustaceana*, **2012**, 85(7), 893-896.
- Nagashima, Y.; Ohta, A.; Yin, X.; Ishizaki, S.; Matsumoto, T.; Doi, H.; Ishibashi, T. Difference in Uptake of Tetrodotoxin and Saxitoxins into Liver Tissue Slices among Pufferfish, Boxfish and Porcupinefish. *Marine Drugs*, **2018**, 16(17). <https://doi.org/10.3390/md16010017>
- Pajuelo, J.G.; González, J.A.; Triay-Portella, R.; Martín, J.A.; Ruiz-Díaz, R.; Lorenzo, J.M.; Luque, Á. Introduction of non-native marine fish species to the Canary Islands waters through oil platforms as vectors. *Journal of Marine Systems*, **2016**, 163, 23-30.
- Pinto, M. F.; Mourão; J.daS.; Alves, R.R.N. Ethnotaxonomical considerations and usage of ichthyofauna in a fishing community in Ceará State, Northeast Brazil. *Journal of Ethnobiology and Ethnomedicine*, **2013**, 9(17).
- Potter, I.C.; Cheal, A.J.; Loneragan, N.R. Protracted estuarine phase in the life cycle of the marine pufferfish *Torquigener pleurogramma*. *Marine Biology*. **1988**, 98(3), 317-329.
- Saad, A.; Alkusairy, H.; Sabour, W. First record of the Emperor angelfish, *Pomacanthus imperator* (Acthenoptergii: Pomacanthidae) in the Syrian coast (Eastern Mediterranean). *Marine Biodiversity Records*. **2018**, 11(1), 1-4.

- Schäfer, S.; Monteiro, J.; Castro, N.; Rilov, G.; Canning-Clode, J. *Cronius ruber* (Lamarck, 1818) arrives to Madeira Island: a new indication of the ongoing tropicalization of the northeastern Atlantic. *Marine Biodiversity*, **2019**, 49: 2699-2707.
- Shepherd, B.; Pinheiro, H.; Rocha, L. A. Sometimes hard to swallow: Attempted feeding on a porcupinefish results in death of both predator and prey. *WIO Journal of Marine Science*, **2019**, 18(2), 87–89. <https://doi.org/10.4314/wiojms.v18i2.8>
- Sommer, C.; Schneider, W.; Poutiers, J.M. The living marine resources of Somalia. In *FAO species identification field guide for fishery purposes*. **1996**.
- Triay-Portella, R.; Pajuelo, J.G.; Manent, P.; Espino, F.; Ruiz-Díaz, R.; Lorenzo, J.M.; González, J.A. New records of non-indigenous fishes (Perciformes and Tetraodontiformes) from the Canary Islands (north-eastern Atlantic). *Cybium*, **2015**, 39(3), 163–174. <https://doi.org/10.26028/cybium/2015-393-001>
- Uyeno, D.; Nagasawa, K. Three new species of Hatschekia Poche, 1902 (Copepoda: Siphonostomatoida: Hatschekiidae) parasitic on *Abalistes filamentosus* (Pisces: Tetraodontiformes: Balistidae) from off Okinawa, Japan. *Systematic Parasitology*, **2009**, 74(3), 225-237.
- Vilar, C.C.; Spach, H.L.; Souza-Conceição, J. Fish assemblage in shallow areas of Baía da Babitonga, southern Brazil: structure, spatial and temporal patterns. *Pan-American Journal of Aquatic Sciences*, **2011**, 6(4), 303–319.
- Wirtz, P.; Fricke, R.; Biscoito, M.J. The coastal fishes of Madeira Island - New records and an annotated check-list. *Zootaxa*, **2008**, 26(1715), 1–26. <https://doi.org/10.11646/zootaxa.1715.1.1>
